# Supplementary material for: Generation of Ru(iii)-hypochlorite with resemblance to the heme-dependent haloperoxidase enzyme
Source: Royal Society of Chemistry journal article supplement (doi:10.1039/d3dt02028b), 2023-01-01
Supplement: d3dt02028b1.pdf [file d3dt02028b1.pdf]

**Supporting online information for**

**Generation of Ru(III)-hypochlorite with resemblance to heme dependent haloperoxidase enzyme†**

Rakesh Kumar,<sup>a</sup> Faiza Ahsan,<sup>b</sup> Ayushi Awasthi,<sup>a</sup> Marcel Swart<sup>b,c\*</sup> and Apparao Draksharapu<sup>a,\*</sup>

<sup>a</sup> Southern Laboratories - 208A, Department of Chemistry, Indian Institute of Technology Kanpur, Kanpur-208016 (India). [appud@iitk.ac.in](mailto:appud@iitk.ac.in)

<sup>b</sup> IQCC & Departament de Química, Universitat de Girona, 17003 Girona, Spain.

<sup>c</sup> ICREA, 08010, Barcelona, Spain. [marcel.swart@gmail.com](mailto:marcel.swart@gmail.com)

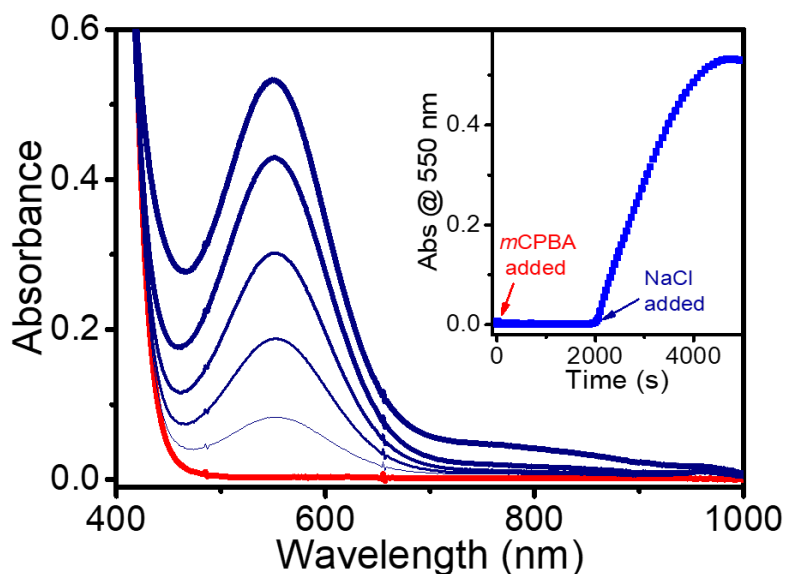

**Fig. S1:** (A) UV/Vis absorption spectral changes upon the reaction of 0.5 mM **1** (red) in 3:1 CH<sub>3</sub>CN:H<sub>2</sub>O with 20 eq. *m*CPBA (no spectral changes occurred) followed by 140 eq. aqueous NaCl (at ca. 2000 s) at room temperature. Inset: The corresponding absorption changes at 550 nm.

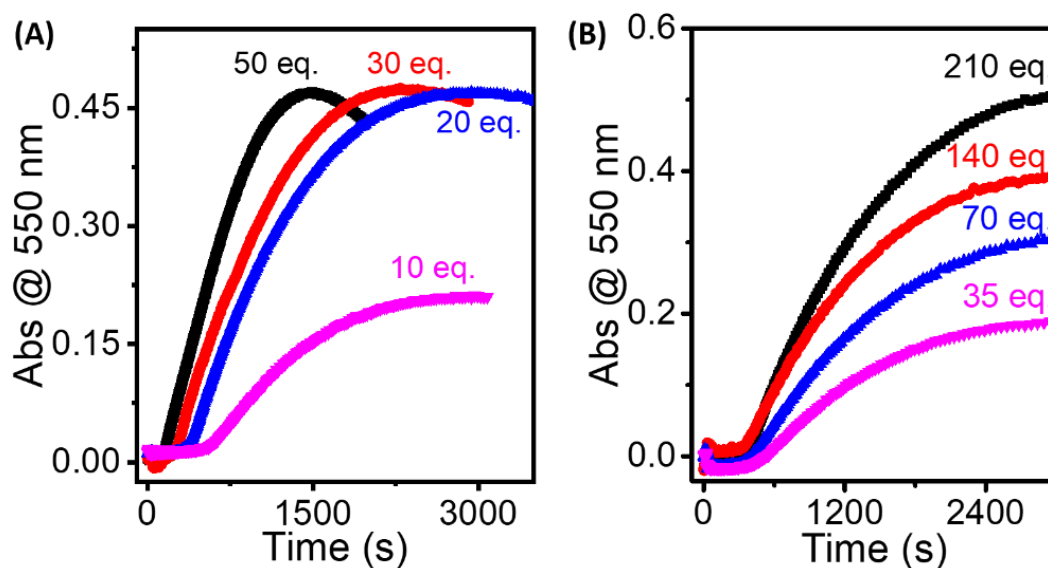

**Fig. S2:** (A) Time-dependent absorption changes at 550 nm upon the reaction of 0.5 mM **1** in 3:1 CH<sub>3</sub>CN:H<sub>2</sub>O (A) with different eq. (10, 20, 30, and 50) of *m*CPBA and 140 eq. aqueous NaCl, and (B) with different eq. (35, 70, 140, 210, 280) of aqueous NaCl and 20 eq. *m*CPBA at room temperature.

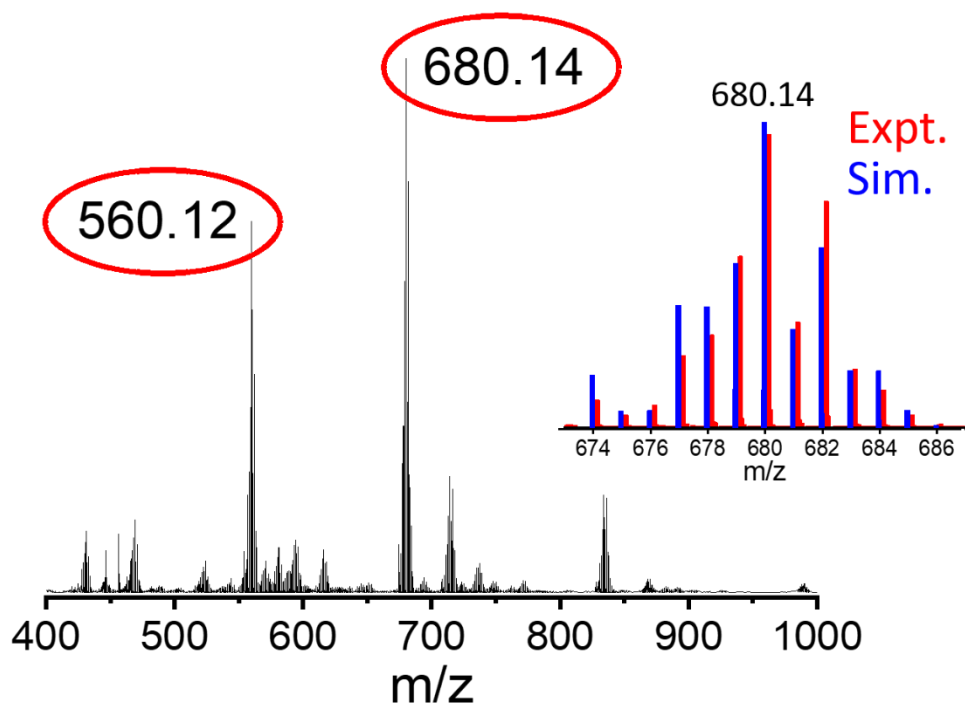

**Fig. S3:** Positive mode ESI-mass data of **2**, generated upon the reaction of **1** with 20 eq. of *m*CPBA and 140 eq. of aqueous NaCl in 3:1 CH<sub>3</sub>CN:H<sub>2</sub>O at room temperature.

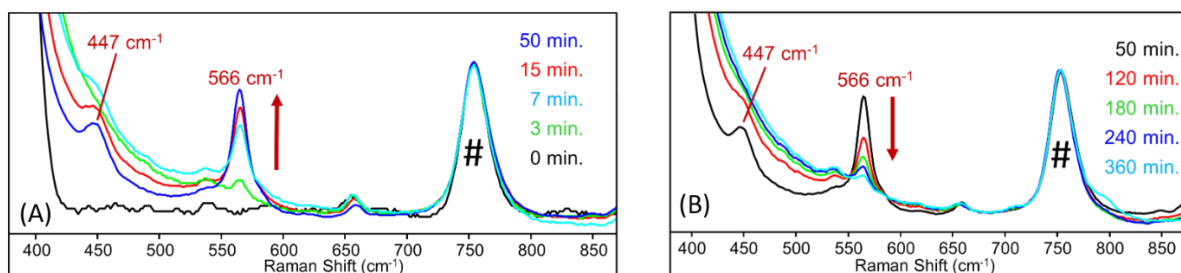

**Fig. S4:** Time-dependent resonance Raman spectra (at  $\lambda_{\text{exc}}$  561 nm) for the (A) formation and (B) decay of **2** in 3:1 CH<sub>3</sub>CN:H<sub>2</sub>O generated by adding 20 eq. of *m*CPBA and 140 eq. of aqueous NaCl to **1** at room temperature. # Indicates solvent peak.

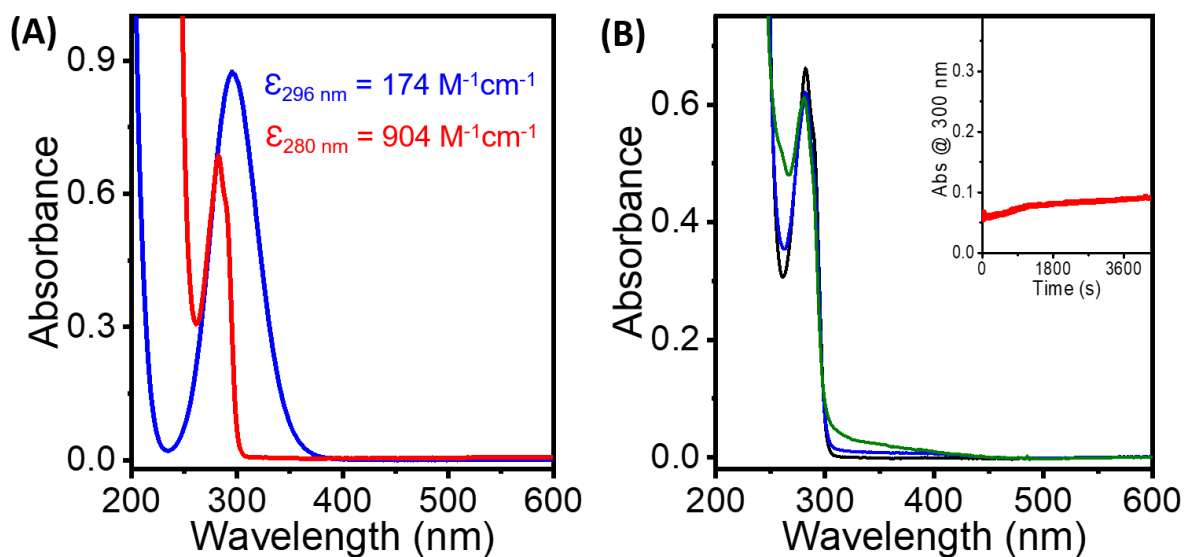

**Fig. S5:** (A) UV/Vis absorption spectra of 5 mM NaOCl (blue) and 0.75 mM *m*CPBA (red). (B) The reaction of *m*CPBA with 70 eq. aqueous NaCl in MeCN: H<sub>2</sub>O (3:1) at room temperature followed by UV/Vis absorption spectroscopy. Inset: The corresponding absorption changes at 300 nm.

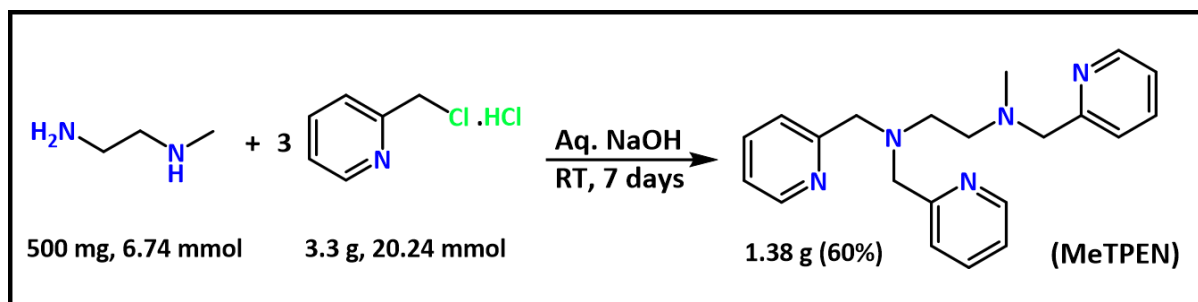

**Scheme S1:** Synthetic procedure for MeTPEN ligand.

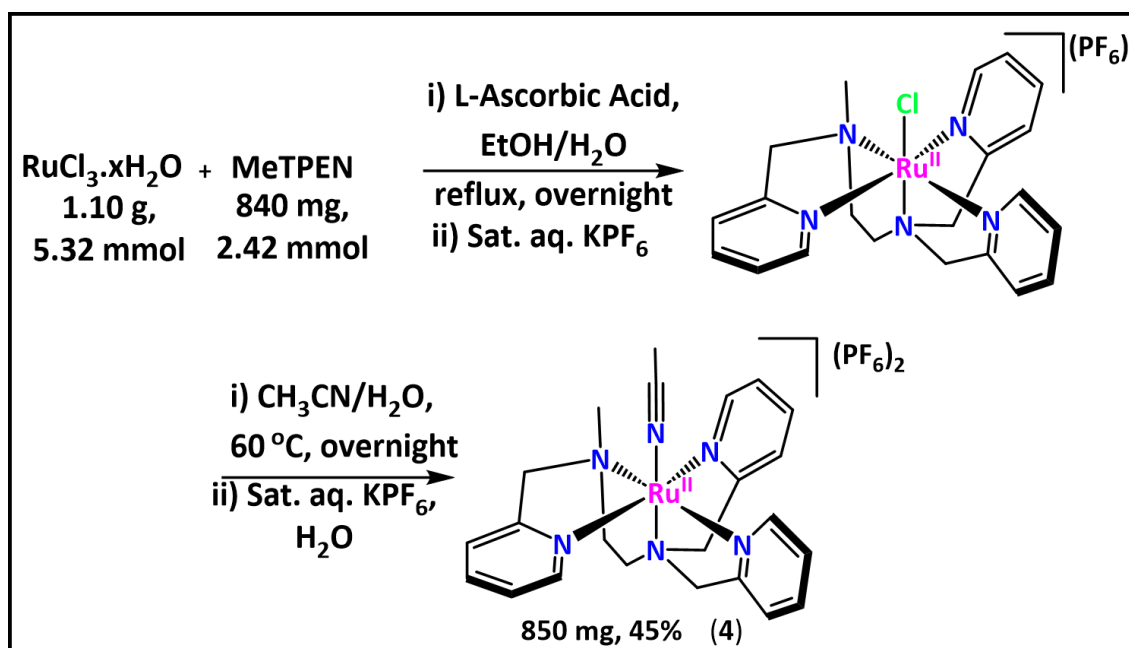

**Scheme S2:** Synthetic procedure for [Ru<sup>II</sup>(MeTPEN)(NCCH<sub>3</sub>)](PF<sub>6</sub>)<sub>2</sub> (**4**).

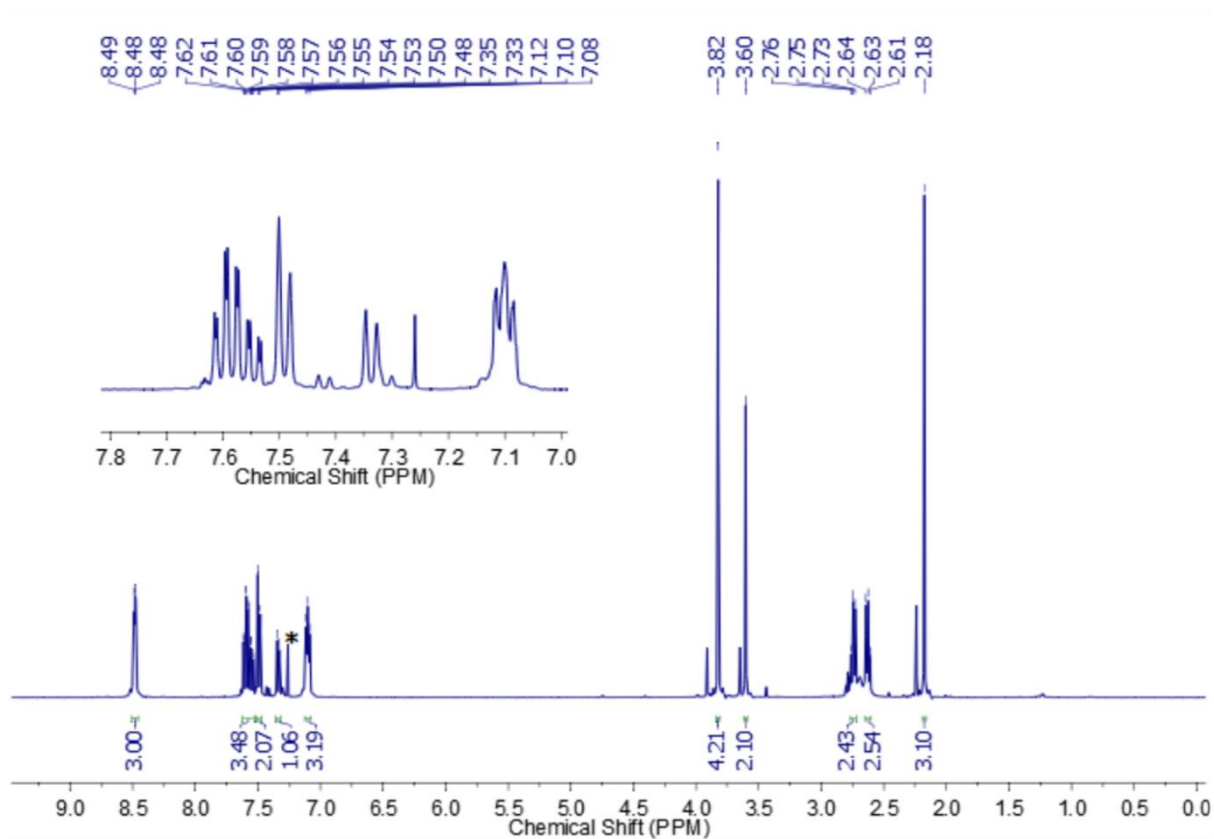

**Fig. S6:**  $^1\text{H}$  NMR spectrum of MeTPEN in  $\text{CDCl}_3$  at 400 MHz. (\* peak for solvent)

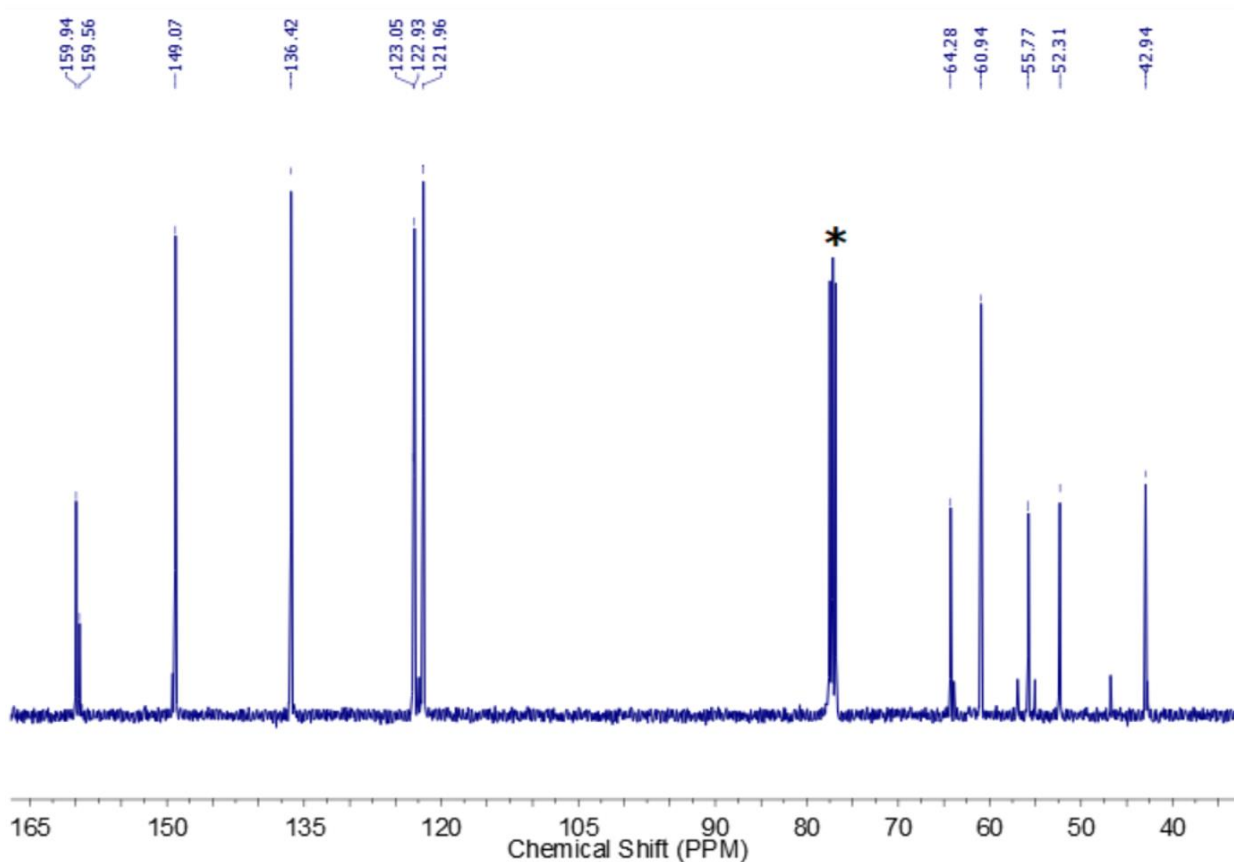

**Fig. S7:**  $^{13}\text{C}$  NMR spectrum of MeTPEN in  $\text{CDCl}_3$  at 100 MHz. (\* peak for solvent)

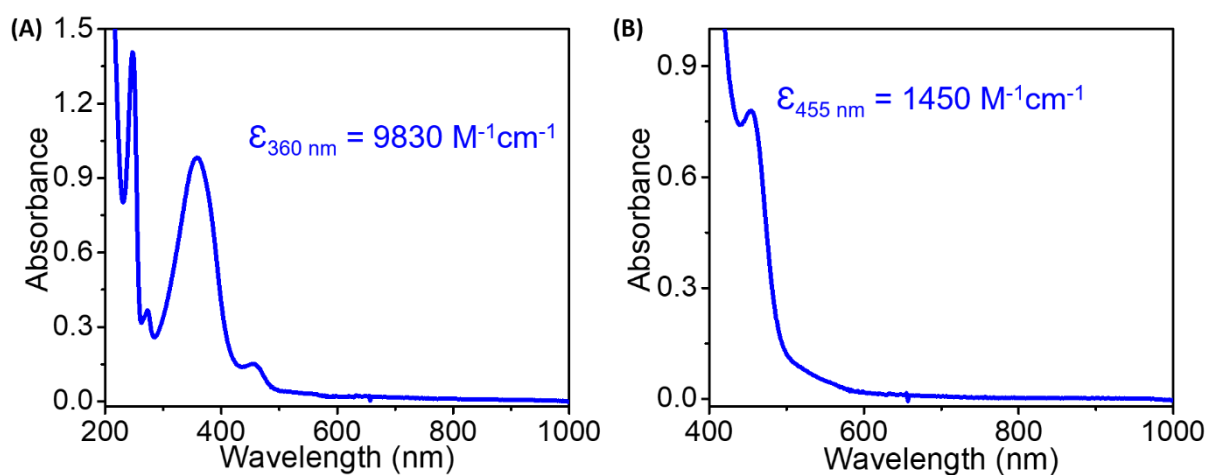

**Fig. S8:** UV/Vis absorption spectra (A) 0.1 mM and (B) 0.5 mM of **4** in CH<sub>3</sub>CN at room temperature.

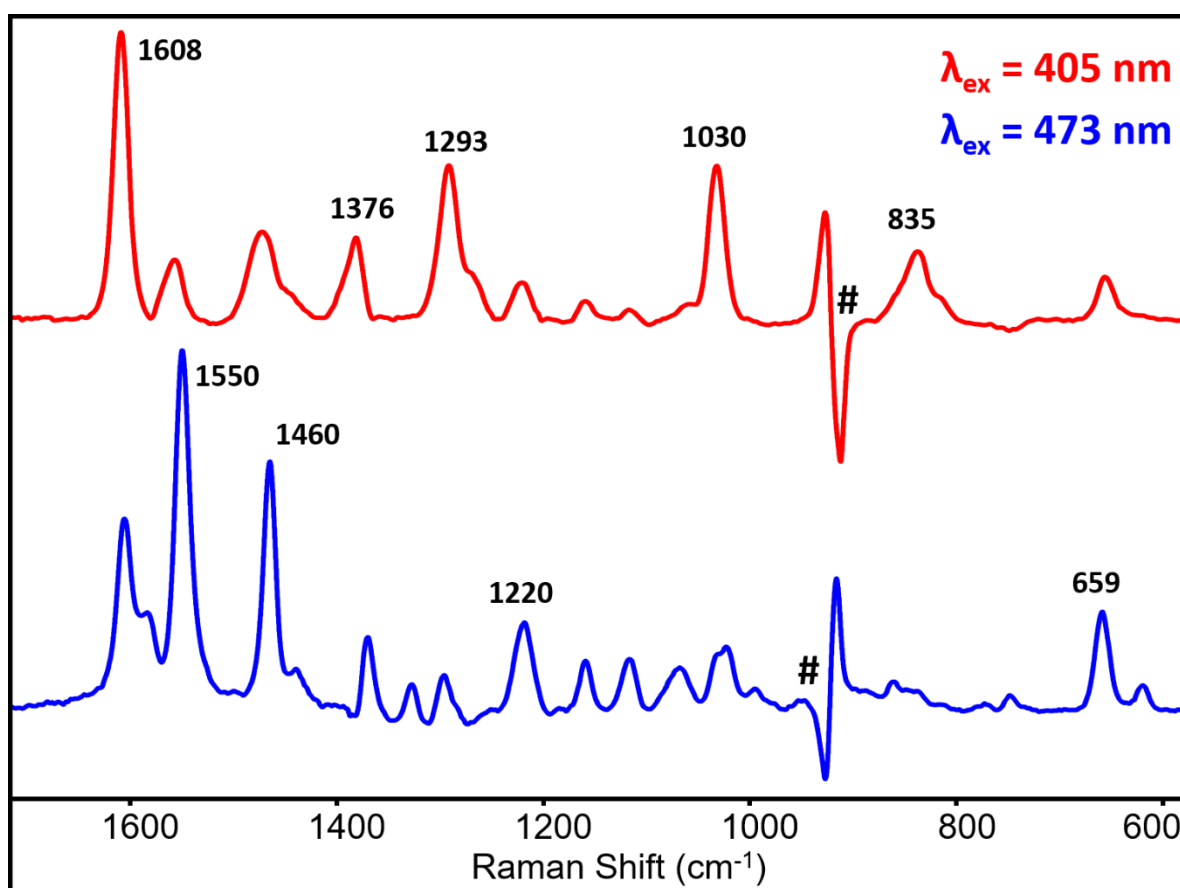

**Fig. S9:** Solvent subtracted resonance Raman spectrum of 0.5 mM **4** in acetonitrile at  $\lambda_{\text{exc}} = 405 \text{ nm}$  (red) and  $473 \text{ nm}$  (blue). #Indicate imperfect solvent subtraction.

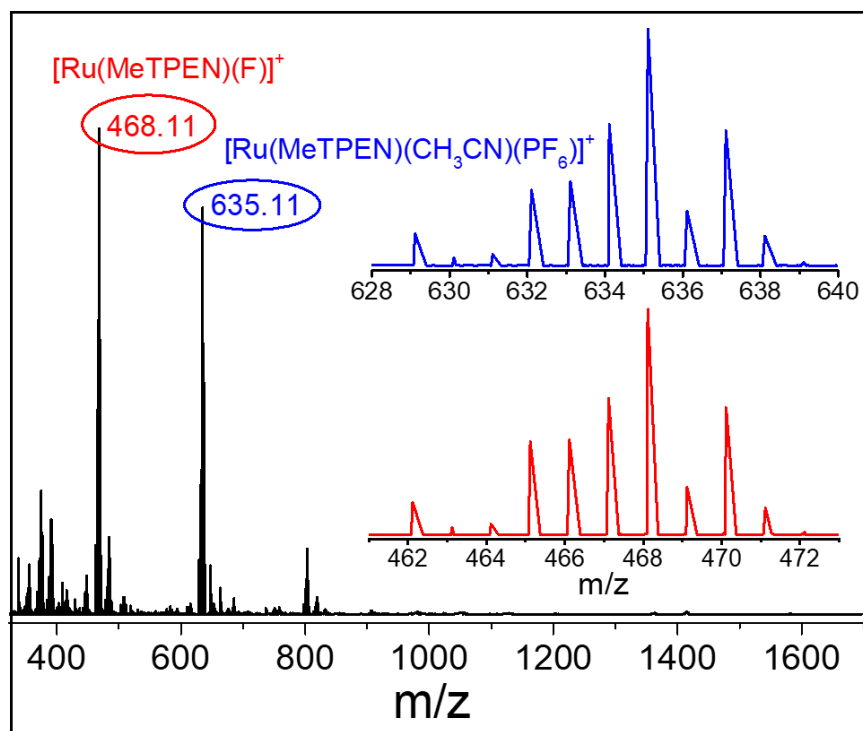

**Fig. S10:** Positive mode ESI-mass spectrum of **4** in  $\text{CH}_3\text{CN}$ .

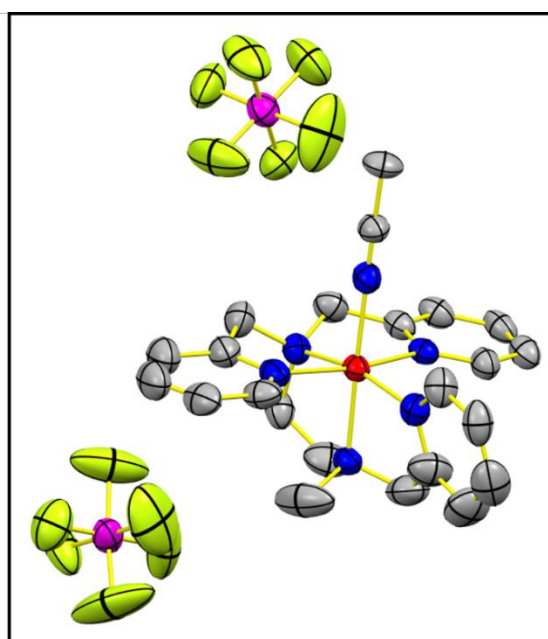

**Fig. S11:** X-ray crystal structure of  $[\text{Ru}^{\text{II}}(\text{MeTPEN})(\text{NCCH}_3)](\text{PF}_6)_2$  (**4**). Hydrogen atoms were omitted for clarity.

**Table S1:** Crystal data and structure refinement of **4**.

|                                             |                                                                                  |
|---------------------------------------------|----------------------------------------------------------------------------------|
| Empirical formula                           | C <sub>23</sub> H <sub>28</sub> F <sub>12</sub> N <sub>6</sub> P <sub>2</sub> Ru |
| Formula weight                              | 779.52                                                                           |
| Temperature/K                               | 100                                                                              |
| Crystal system                              | monoclinic                                                                       |
| Space group                                 | P2 <sub>1</sub> /c                                                               |
| a/Å                                         | 13.1578(15)                                                                      |
| b/Å                                         | 11.6873(13)                                                                      |
| c/Å                                         | 19.140(2)                                                                        |
| α/°                                         | 90                                                                               |
| β/°                                         | 103.637(4)                                                                       |
| γ/°                                         | 90                                                                               |
| Volume/Å <sup>3</sup>                       | 2860.3(6)                                                                        |
| Z                                           | 4                                                                                |
| ρ <sub>calc</sub> /cm <sup>3</sup>          | 1.810                                                                            |
| μ/mm <sup>-1</sup>                          | 0.766                                                                            |
| F(000)                                      | 1560.0                                                                           |
| Crystal size/mm <sup>3</sup>                | 0.19 × 0.17 × 0.16                                                               |
| Radiation                                   | MoKα (λ = 0.71073)                                                               |
| 2θ range for data collection/°              | 4.878 to 56.698                                                                  |
| Index ranges                                | -17 ≤ h ≤ 17, -15 ≤ k ≤ 15, -25 ≤ l ≤ 25                                         |
| Reflections collected                       | 43525                                                                            |
| Independent reflections                     | 7131 [R <sub>int</sub> = 0.1260, R <sub>sigma</sub> = 0.0852]                    |
| Data/restraints/parameters                  | 7131/0/399                                                                       |
| Goodness-of-fit on F <sup>2</sup>           | 0.984                                                                            |
| Final R indexes [I ≥ 2σ (I)]                | R <sub>1</sub> = 0.0755, wR <sub>2</sub> = 0.1900                                |
| Final R indexes [all data]                  | R <sub>1</sub> = 0.1349, wR <sub>2</sub> = 0.2407                                |
| Largest diff. peak/hole / e Å <sup>-3</sup> | 1.26/-1.12                                                                       |



**Table S2:** Selected Bond lengths (Å) of **1**, **4** and bond distance comparison with  $[\text{Ru}^{\text{II}}(\text{TPA})(\text{NCCH}_3)_2](\text{PF}_6)_2$  and  $[\text{Ru}^{\text{II}}(\text{N4Py})(\text{OH}_2)](\text{PF}_6)_2$ .<sup>1,2</sup>

|                       | <b>1</b> | <b>4</b> | $[\text{Ru}^{\text{II}}(\text{TPA})(\text{NCCH}_3)_2](\text{PF}_6)_2^{\text{a}}$ | $[\text{Ru}^{\text{II}}(\text{N4Py})(\text{OH}_2)](\text{PF}_6)_2^{\text{b}}$ |
|-----------------------|----------|----------|----------------------------------------------------------------------------------|-------------------------------------------------------------------------------|
| Atom                  | Length/Å | Length/Å | Length/Å                                                                         | Length/Å                                                                      |
| Ru-N <sub>py</sub>    | 2.067(3) | 2.051(6) | 2.062(4)                                                                         | 2.057(4)                                                                      |
|                       | 2.060(3) | 2.066(6) | 2.071(4)                                                                         | 2.052(4)                                                                      |
|                       | 2.071(3) | 2.068(6) | 2.056(4)                                                                         | 2.061(4)                                                                      |
| Ru-N <sub>amine</sub> | 2.069(3) | 2.087(6) | 2.053(4)                                                                         | 1.967(5)                                                                      |
|                       | 2.141(2) | 2.079(6) |                                                                                  |                                                                               |
| Ru-N <sub>MeCN</sub>  | 2.030(3) | 2.041(6) | 2.031(5)                                                                         |                                                                               |
|                       |          |          | 2.037(5)                                                                         |                                                                               |
| Ru-O <sub>water</sub> |          |          |                                                                                  | 2.172(5)                                                                      |
| Ru-N <sub>Avg</sub>   | 2.073    | 2.066    | 2.051                                                                            | 2.039                                                                         |

<sup>a</sup> TPA: tris(2-pyridylmethyl)amine;

<sup>b</sup> N4Py: N,N-bis(2-pyridyl-methyl)-N-bis(2-pyridyl)methylamine)

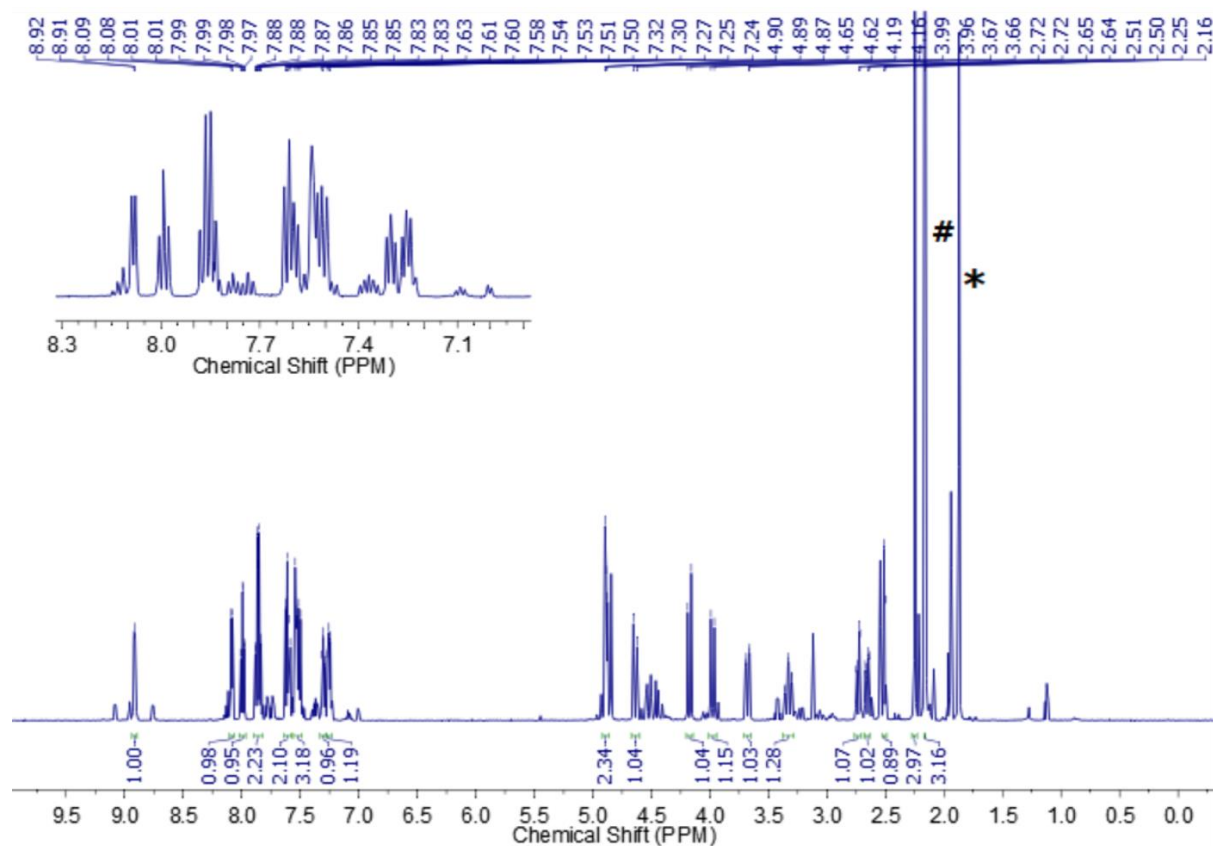

**Fig. S12:** <sup>1</sup>H NMR spectrum of **4** in CD<sub>3</sub>CN at 500 MHz. (\*peak for solvent, #peak for H<sub>2</sub>O)

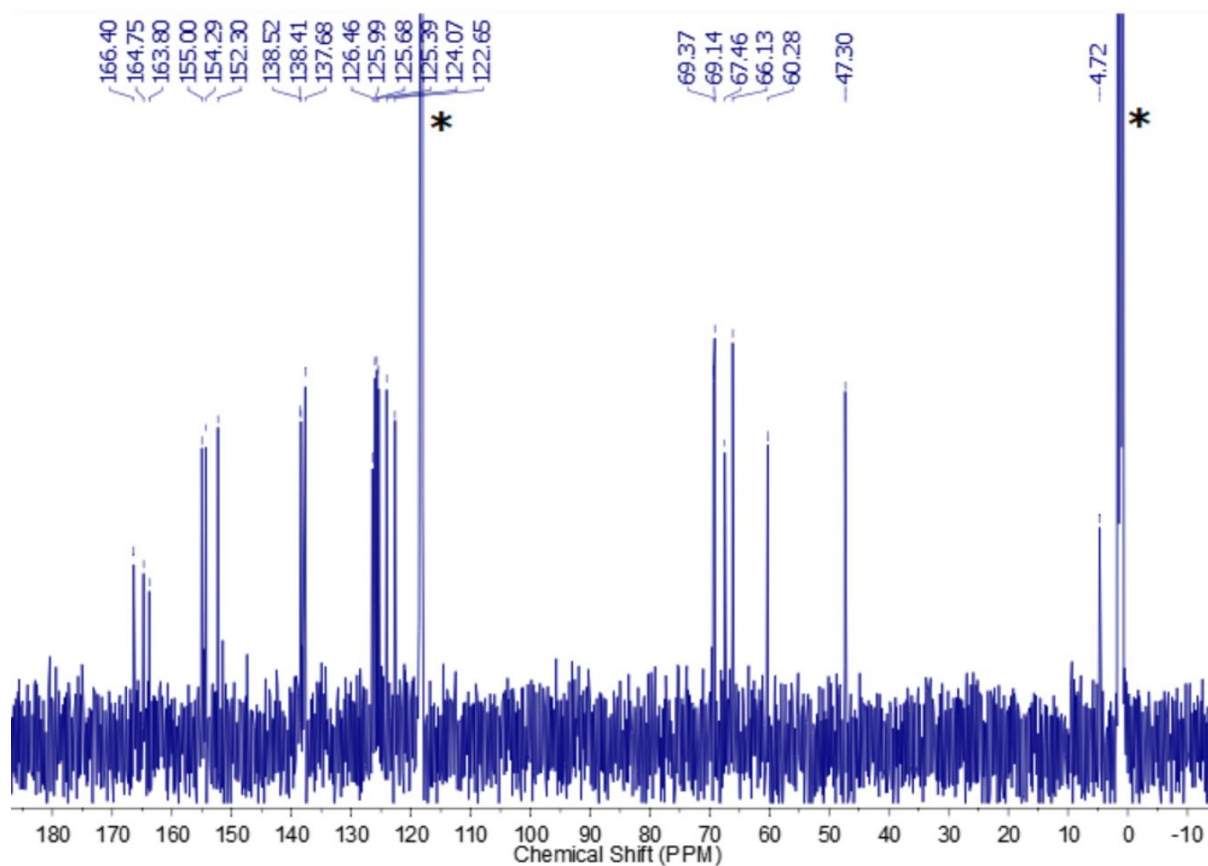

**Fig. S13:**  $^{13}\text{C}$  NMR spectrum of **4** in  $\text{CD}_3\text{CN}$  at 125 MHz. (\*peak for solvent)

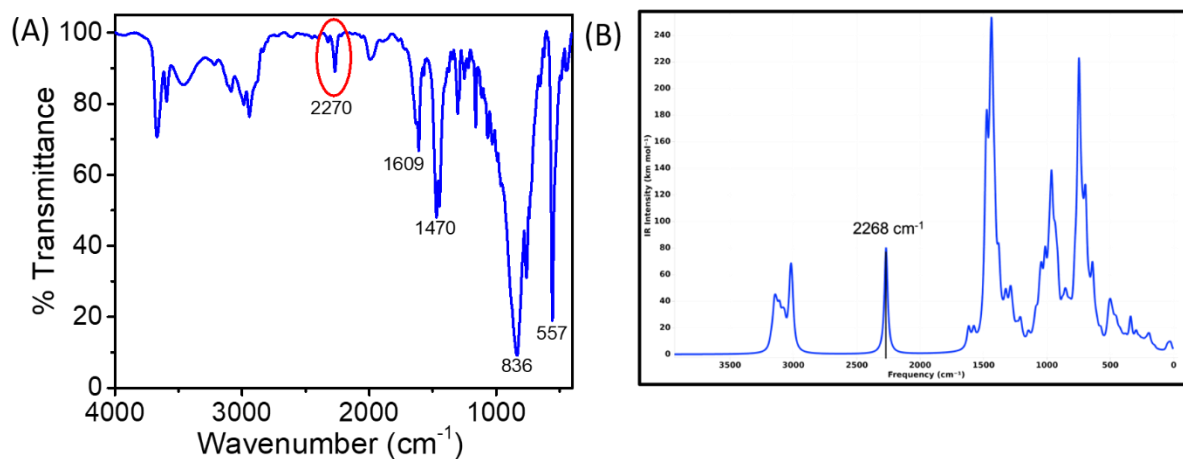

**Fig. S14:** (A) Solid-state FT-IR spectrum of **4** on KBr pellet. The band at  $2270\text{ cm}^{-1}$  is originated from the bound acetonitrile ligand. (B) Computationally calculated IR spectrum of **4** and  $2268\text{ cm}^{-1}$  band corresponds to the bound acetonitrile ligand.

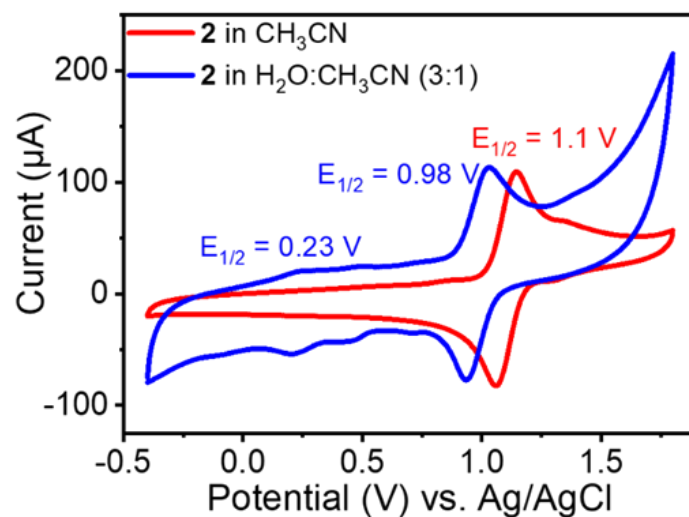

**Fig. S15:** Cyclic voltammograms of **4** in CH<sub>3</sub>CN (red) and in 3 : 1 H<sub>2</sub>O :CH<sub>3</sub>CN (blue) at room temperature (scan rate 500 mV s<sup>-1</sup>).

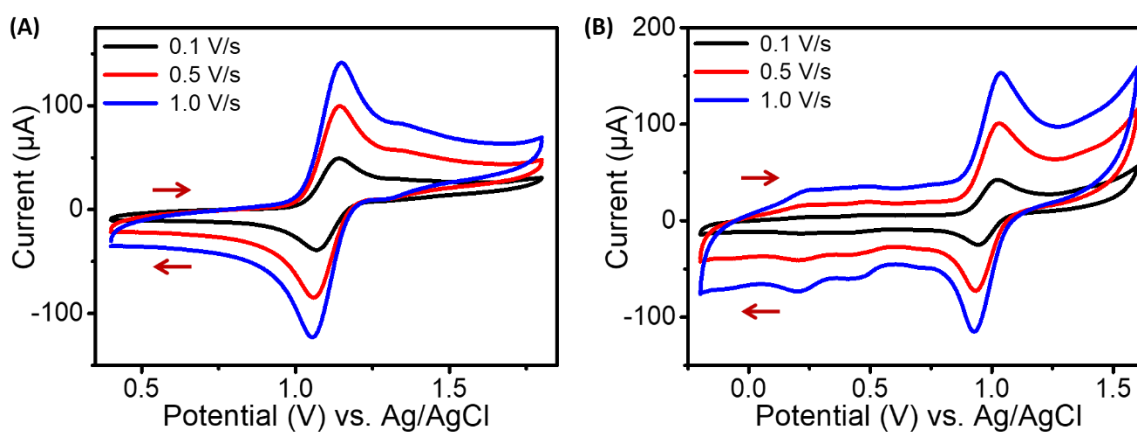

**Fig. S16:** Scan rate (in V/s) dependent cyclic voltammograms of **4** (A) in CH<sub>3</sub>CN, and (B) in H<sub>2</sub>O:CH<sub>3</sub>CN (3:1).

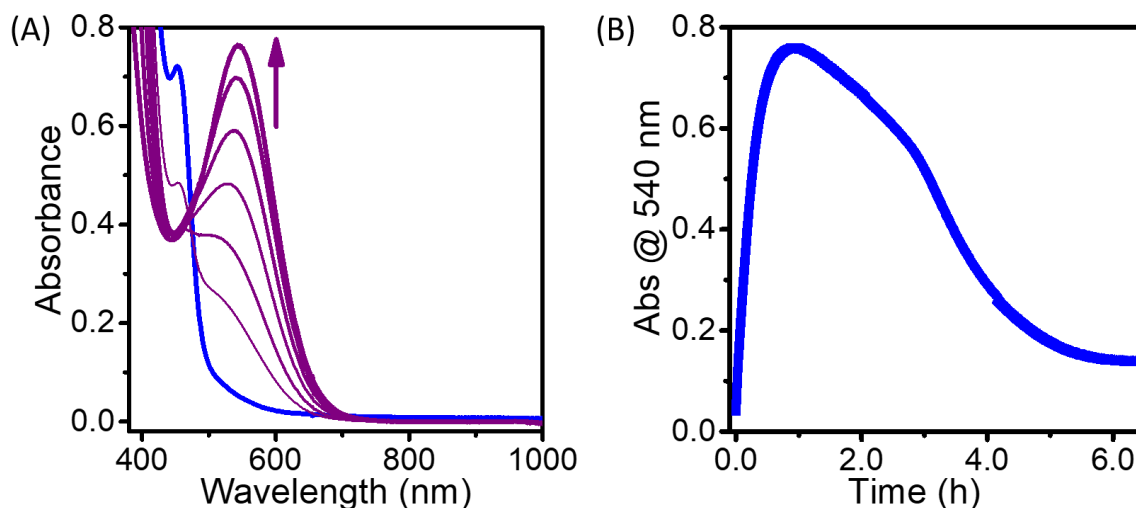

**Fig. S17:** (A) UV/Vis absorption spectral changes upon the reaction of 0.5 mM **4** in 3:1 CH<sub>3</sub>CN:H<sub>2</sub>O with 10 eq. HClO<sub>4</sub> and 10 eq. aqueous NaOCl at room temperature give rise to 540 nm band. (B) The corresponding absorption changes at 540 nm. The intermediate persisted for 4.5 h under these conditions.

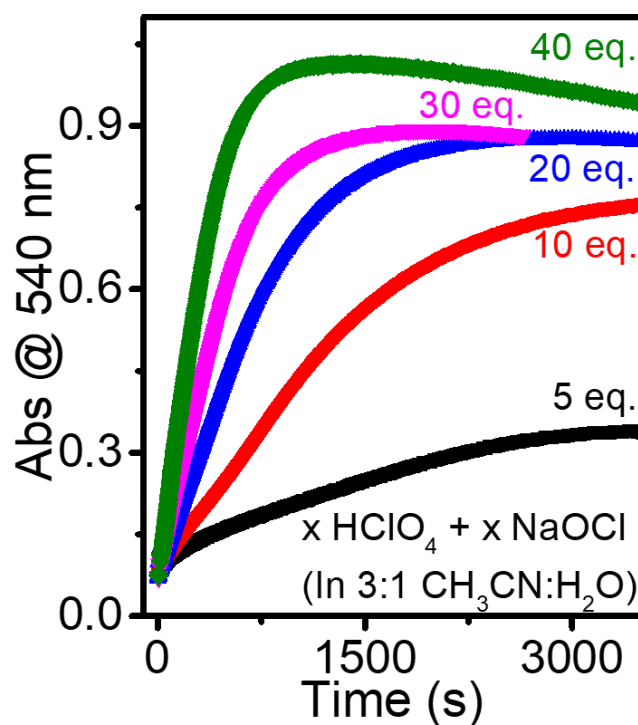

**Fig. S18:** Time-dependent absorption changes at 540 nm upon reaction of 0.5 mM **4** in 3:1 CH<sub>3</sub>CN:H<sub>2</sub>O with different eq. (5, 10, 20, 30, and 40) of HClO<sub>4</sub> and aqueous NaOCl at room temperature.

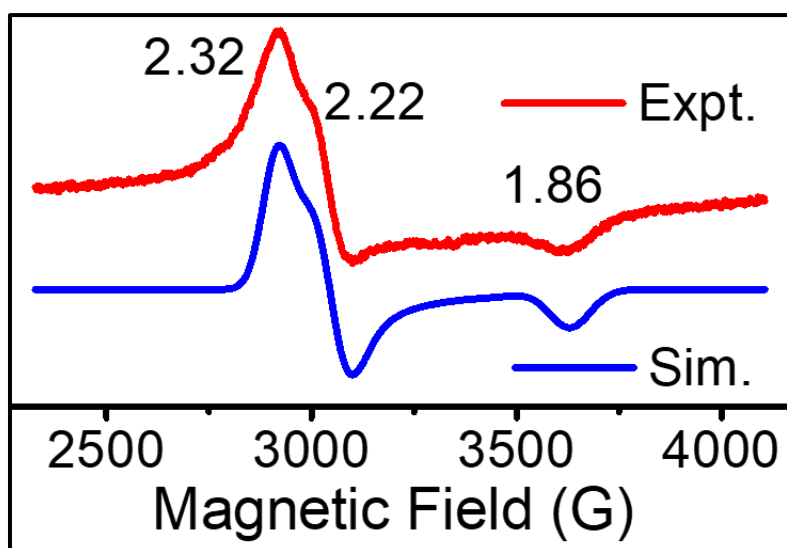

**Fig. S19:** Experimental (red) and simulated (blue) X-band EPR (9.45 GHz) spectrum of **5** ( $g_z = 2.32$ ,  $g_y = 2.22$  and  $g_x = 1.86$ ) measured at 120 K; Modulation amplitude 5 G; Modulation frequency 100 KHz, and Attenuation 10 dB. *Condition to generation 5: 0.5 mM 4 in 3:1 CH<sub>3</sub>CN:H<sub>2</sub>O with 10 eq. HClO<sub>4</sub> and 10 eq. aqueous NaOCl at room temperature.*

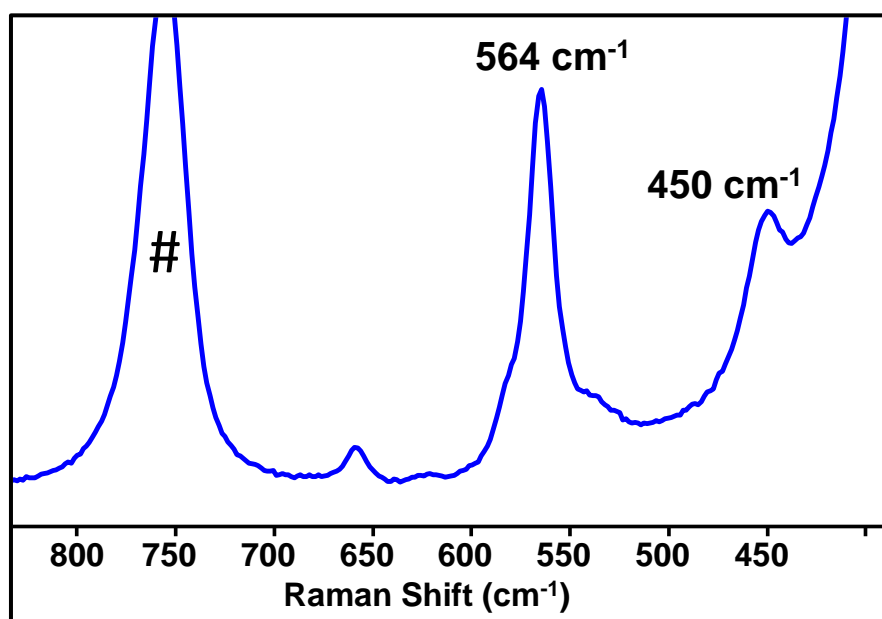

**Fig. S20:** Resonance Raman spectrum of **5** in MeCN: H<sub>2</sub>O (3:1) obtained at  $\lambda_{\text{exc}}$  561 nm. # Indicate solvent band. *Conditions to generate 5: 0.5 mM 4 in 3:1 CH<sub>3</sub>CN:H<sub>2</sub>O with 10 eq. HClO<sub>4</sub> and 10 eq. aqueous NaOCl at room temperature.*

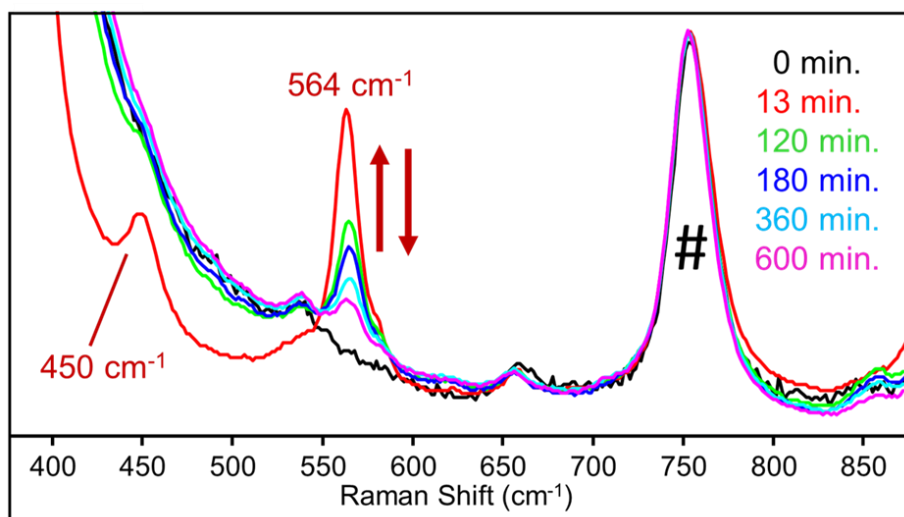

**Fig. S21:** Time-dependent resonance Raman spectra (at  $\lambda_{\text{exc}}$  561 nm) of **5** in 3:1  $\text{CH}_3\text{CN}:\text{H}_2\text{O}$  generated by adding 20 eq. of *m*CPBA and 140 eq. of aqueous NaCl to **4** at room temperature. # Indicates solvent peak.

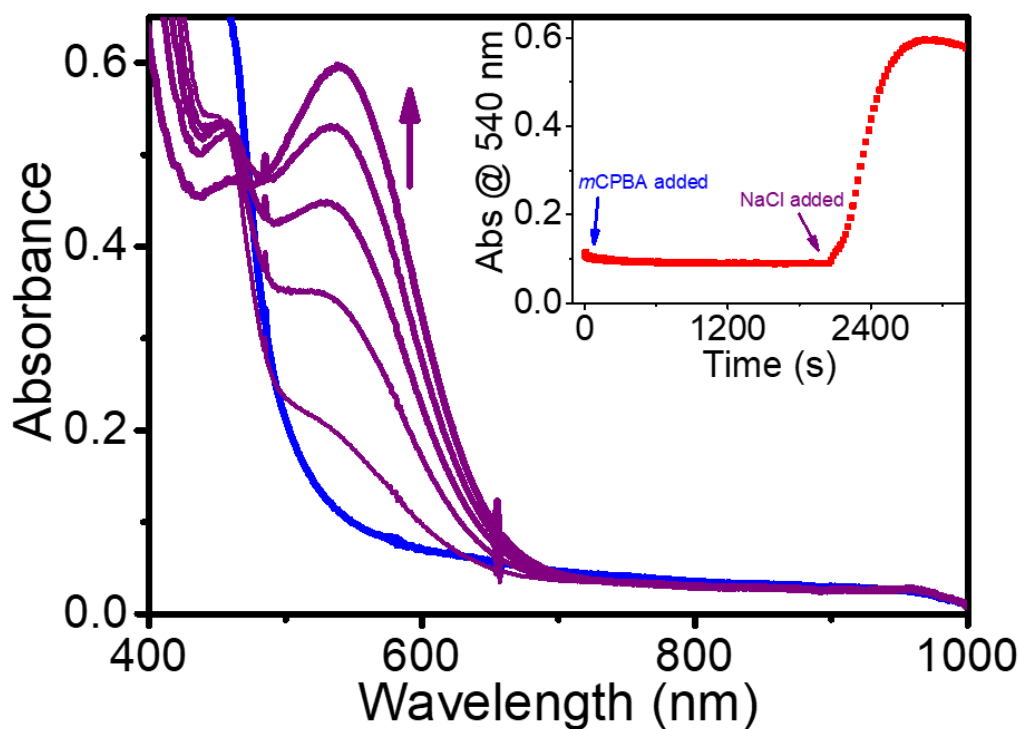

**Fig. S22:** UV/Vis absorption spectral changes upon the reaction of 0.5 mM **4** (Blue) in 3:1  $\text{CH}_3\text{CN}:\text{H}_2\text{O}$  with 20 eq. *m*CPBA and 140 eq. aqueous NaCl at room temperature give rise to 540 nm band. Inset: The corresponding absorption changes at 540 nm with time.

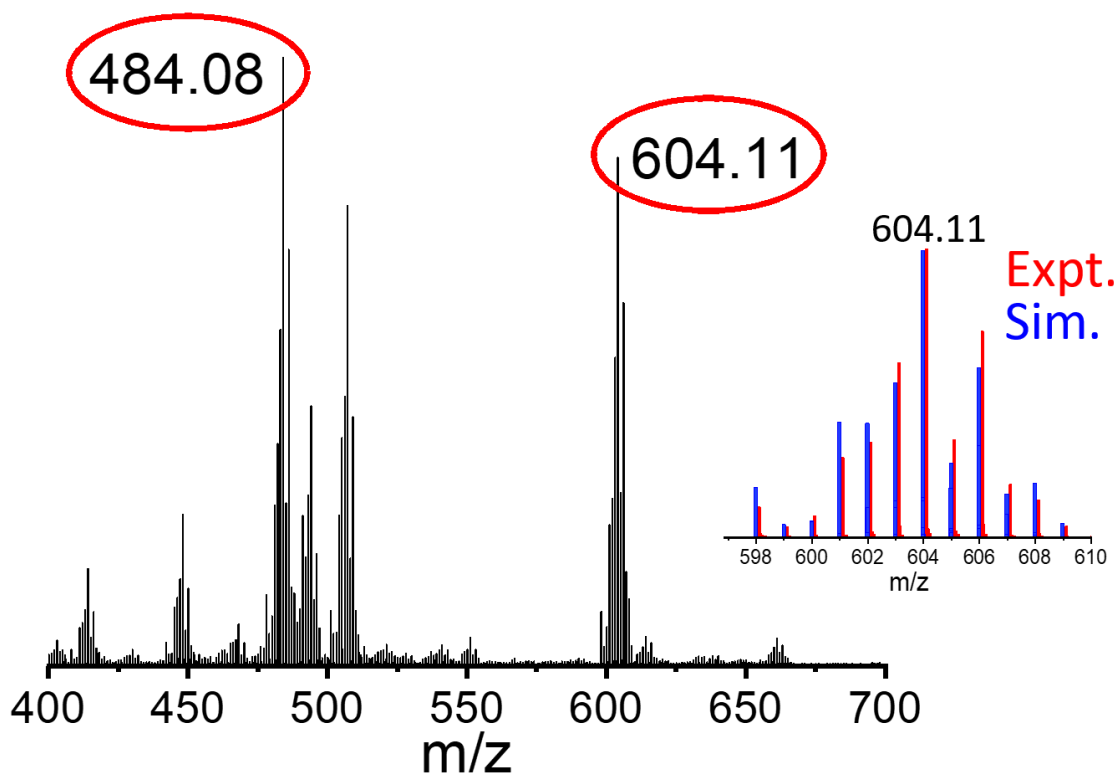

**Fig. S23:** Positive mode ESI-mass data of **5**, generated upon the reaction of **4** with 20 eq. of *m*CPBA and 140 eq. of aqueous NaCl in 3:1 CH<sub>3</sub>CN:H<sub>2</sub>O at room temperature.

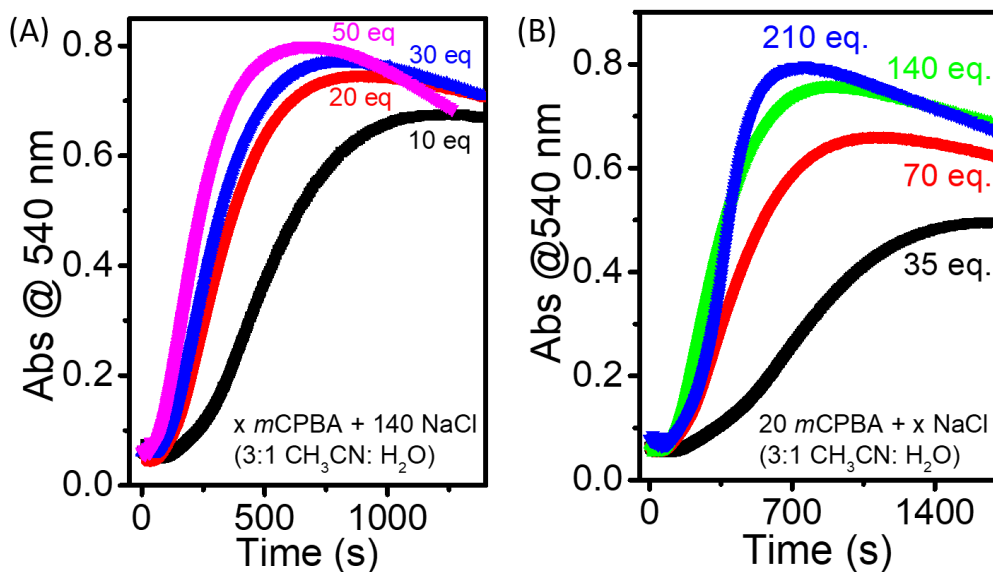

**Fig. S24:** Time-dependent absorption changes at 540 nm upon reaction of 0.5 mM **4** in 3:1 CH<sub>3</sub>CN:H<sub>2</sub>O, (A) with different eq. (10, 20, 30, 50) of *m*CPBA and 140 eq. aqueous NaCl, and (B) with different eq. (35, 70, 140, 210) of aqueous NaCl and 20 eq. *m*CPBA at room temperature.

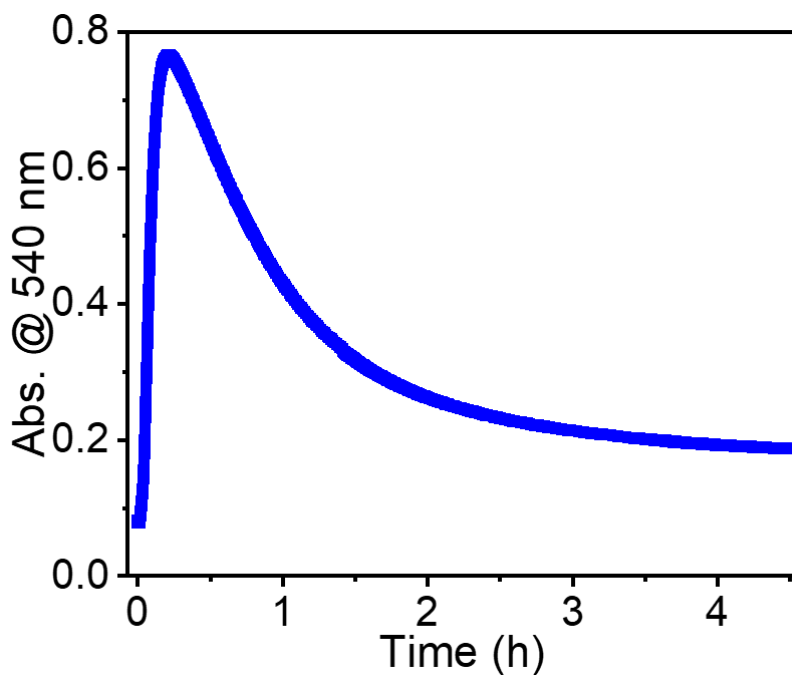

**Fig. S25:** Time-dependent absorption changes at 540 nm of **5**, generated upon the reaction of 0.5 mM **4** with 20 eq. *m*CPBA and 140 eq. aqueous NaCl in 3:1 CH<sub>3</sub>CN:H<sub>2</sub>O at room temperature. The intermediate persisted for 1.5 h under these conditions.



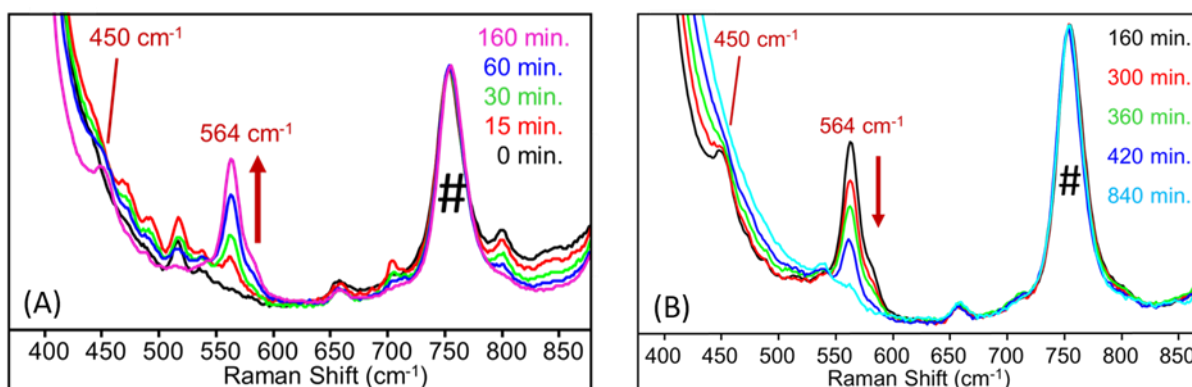

**Fig. S26:** Time-dependent resonance Raman spectra (at  $\lambda_{\text{exc}}$  561 nm) for the (A) formation and (B) decay of **5** in 3:1  $\text{CH}_3\text{CN}:\text{H}_2\text{O}$  generated by the addition of 10 eq. of  $\text{NaOCl}$  and 10 eq. of  $\text{HClO}_4$  to **4** at room temperature. # Indicates solvent peak.

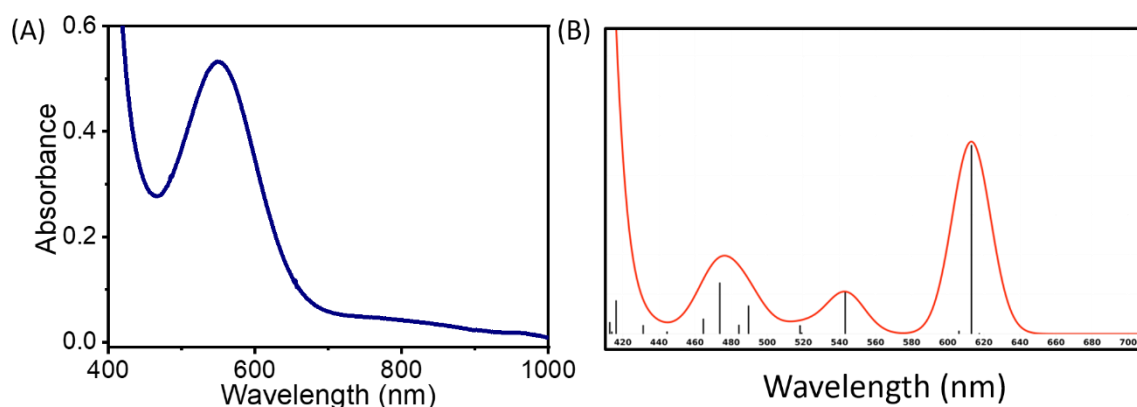

**Fig. S27:** (A) Experimentally obtained UV/Vis absorption spectrum of **2** in  $\text{MeCN}:\text{H}_2\text{O}$  (3:1). Conditions to generate **2**: 0.5 mM **1** in  $\text{MeCN}:\text{H}_2\text{O}$  (3:1 v/v) + 20 eq. *m*CPBA + 140 eq. aqueous  $\text{NaCl}$  at RT. (B) Computed absorption spectrum of **2**.

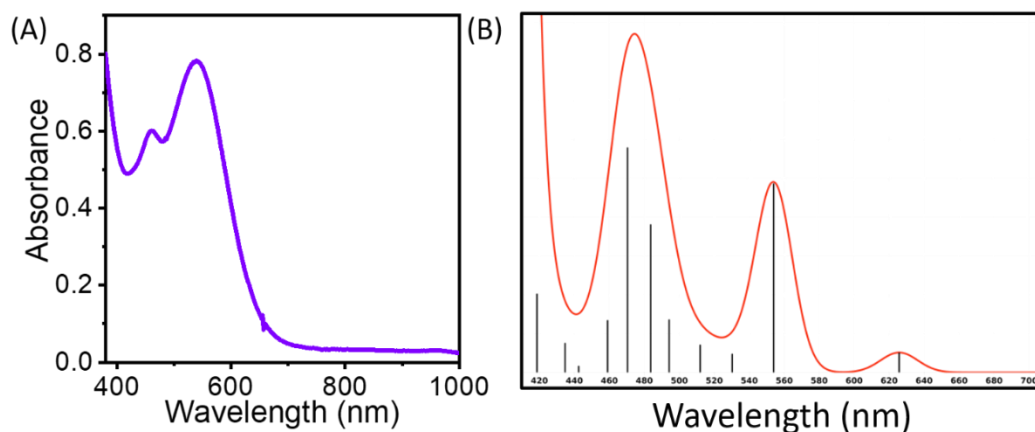

**Fig. S28:** (A) Experimentally obtained UV/Vis absorption spectrum of **5** in MeCN:H<sub>2</sub>O (3:1). Conditions to generate **5**: 0.5 mM **4** in MeCN:H<sub>2</sub>O (3:1 v/v) + 20 eq. mCPBA + 140 eq. aqueous NaCl at RT. (B) Computed absorption spectrum of **5**.

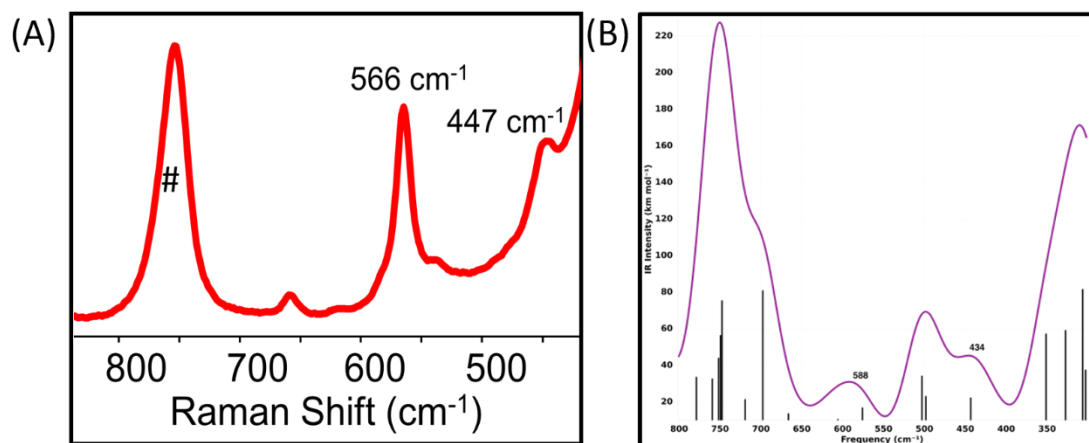

**Fig. S29:** (A) Experimentally obtained resonance Raman spectrum of **2** in MeCN:H<sub>2</sub>O (3:1) obtained at  $\lambda_{\text{exc}}$  561 nm. # Indicate solvent band. (B) Computed IR Spectrum of **2**.

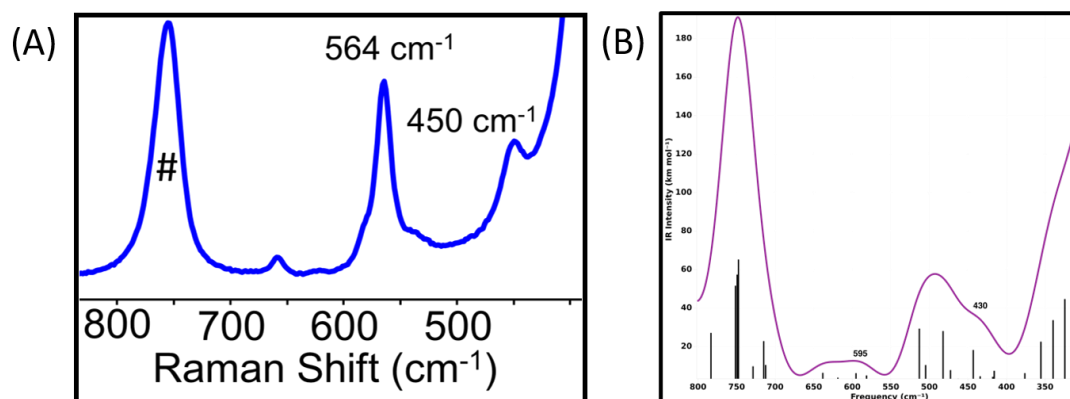

**Fig. S30:** (A) Experimentally obtained resonance Raman spectrum of **5** in MeCN:H<sub>2</sub>O (3:1) obtained at  $\lambda_{\text{exc}}$  561 nm. # Indicate solvent band. (B) Computed IR Spectrum of **5**.

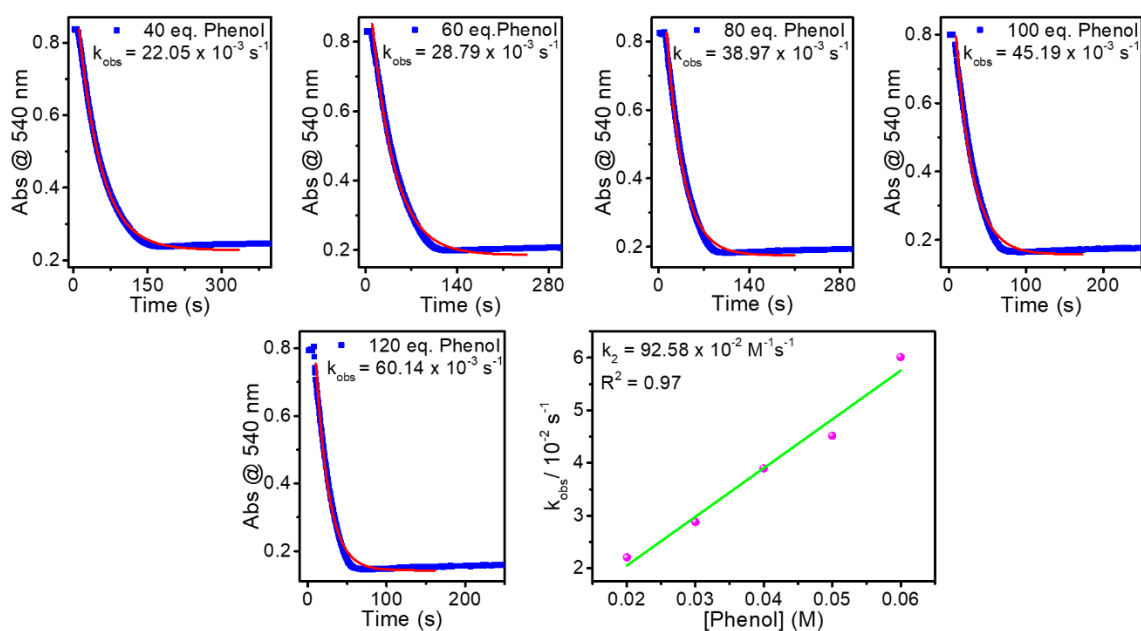

**Fig. S31:** Decay of **5** followed at 540 nm in presence of various concentrations of phenol to give pseudo-first-order rate constants ( $k_{\text{obs}}$ ) in 3:1  $\text{CH}_3\text{CN}:\text{H}_2\text{O}$  at 25 °C. The plot of  $k_{\text{obs}}$  against the concentrations of phenol to obtain a second-order-rate constant ( $k_2 = 92.58 \times 10^{-2} \text{ M}^{-1}\text{s}^{-1}$ ). Conditions to generate **5**: 0.5 mM **4** in 3:1  $\text{CH}_3\text{CN}:\text{H}_2\text{O}$  + 20 eq. *m*CPBA and 140 eq. aqueous NaCl.

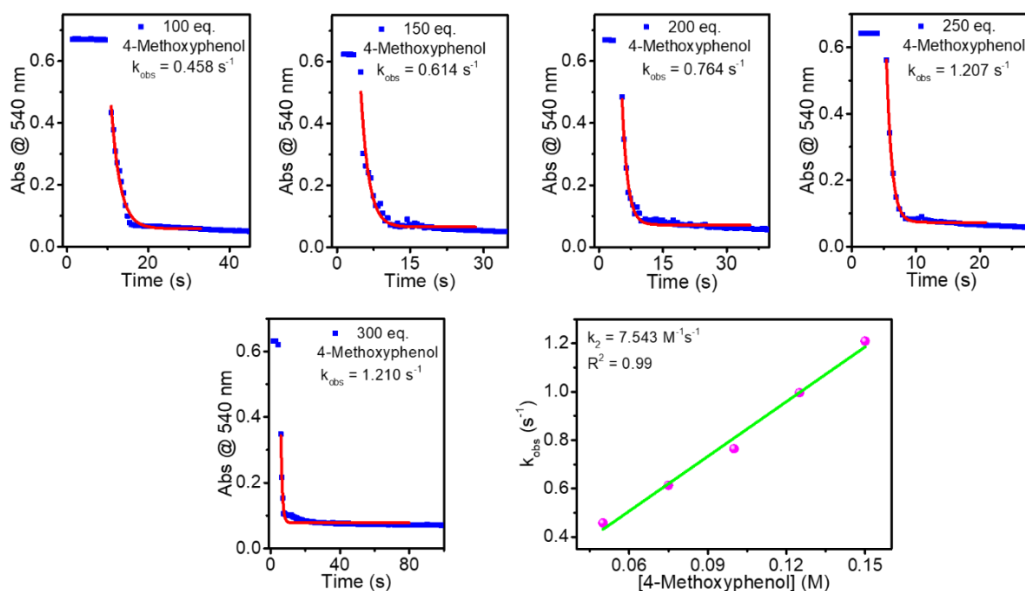

**Fig. S32:** Decay of **5** followed at 540 nm in presence of various concentrations of 4-methoxyphenol to give pseudo-first-order rate constants ( $k_{\text{obs}}$ ) in 3:1  $\text{CH}_3\text{CN}:\text{H}_2\text{O}$  at 25 °C. The plot of  $k_{\text{obs}}$  against the concentrations of 4-methoxyphenol to obtain a second-order-rate constant ( $k_2 = 7.543 \text{ M}^{-1}\text{s}^{-1}$ ). Conditions to generate **5**: 0.5 mM **4** in 3:1  $\text{CH}_3\text{CN}:\text{H}_2\text{O}$  + 20 eq. *m*CPBA and 140 eq. aqueous NaCl.

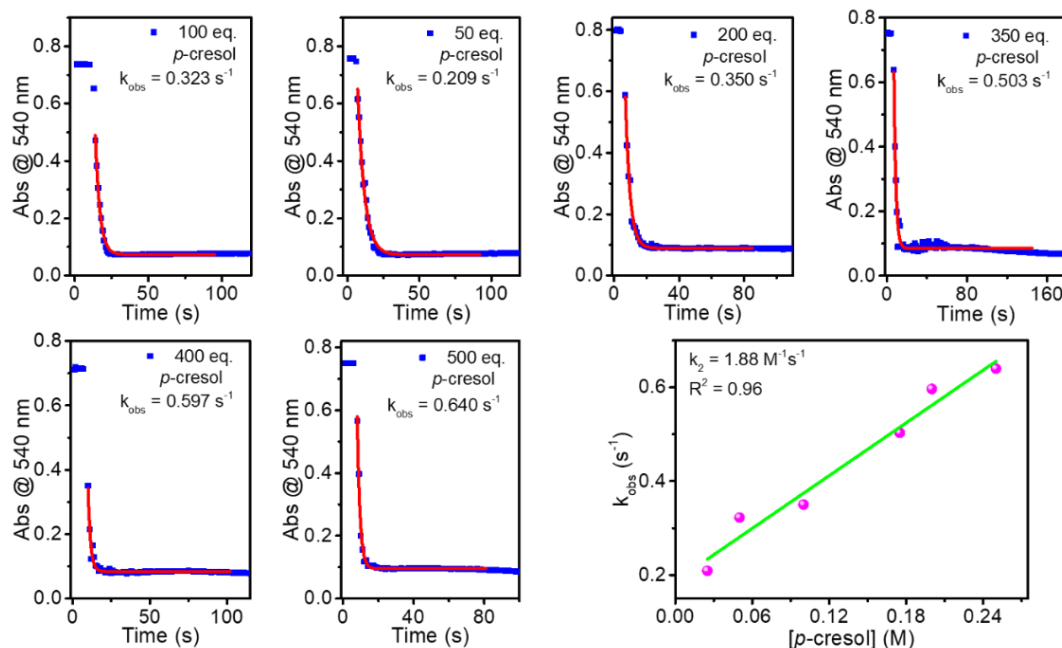

**Fig. S33:** Decay of **5** followed at 540 nm in presence of various concentrations of *p*-cresol to give pseudo-first-order rate constants ( $k_{\text{obs}}$ ) in 3:1  $\text{CH}_3\text{CN}:\text{H}_2\text{O}$  at 25 °C. The plot of  $k_{\text{obs}}$  against the concentrations of *p*-cresol to obtain a second-order-rate constant ( $k_2 = 1.88 \text{ M}^{-1}\text{s}^{-1}$ ). Conditions to generate **5**: 0.5 mM **4** in 3:1  $\text{CH}_3\text{CN}:\text{H}_2\text{O}$  + 20 eq. *m*CPBA and 140 eq. aqueous NaCl.

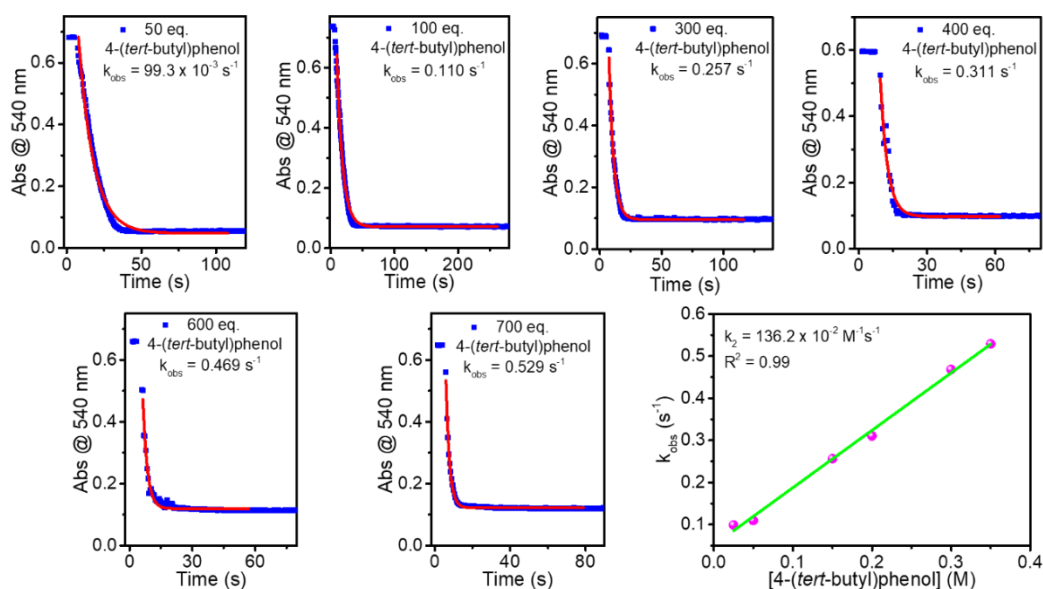

**Fig. S34:** Decay of **5** followed at 540 nm in presence of various concentrations of 4-(*tert*-butyl)phenol to give pseudo-first-order rate constants ( $k_{\text{obs}}$ ) in 3:1  $\text{CH}_3\text{CN}:\text{H}_2\text{O}$  at 25 °C. The plot of  $k_{\text{obs}}$  against the concentrations of 4-(*tert*-butyl)phenol to obtain a second-order-rate constant ( $k_2 = 1.362 \text{ M}^{-1}\text{s}^{-1}$ ). Conditions to generate **5**: 0.5 mM **4** in 3:1  $\text{CH}_3\text{CN}:\text{H}_2\text{O}$  + 20 eq. *m*CPBA and 140 eq. aqueous NaCl.

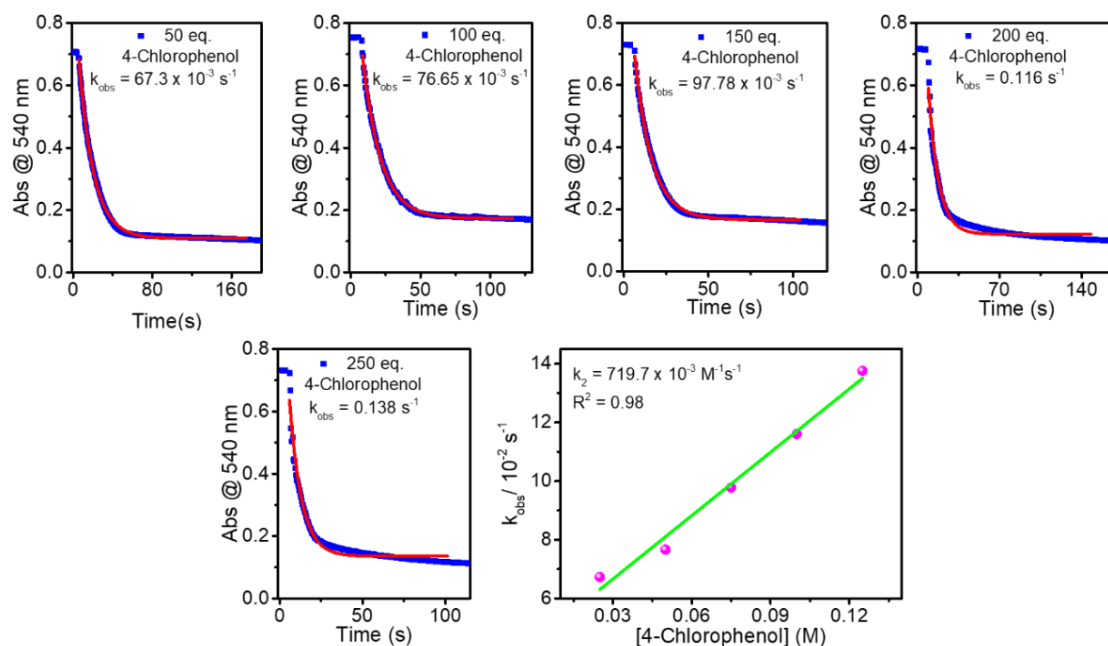

**Fig. S35:** Decay of **5** followed at 540 nm in presence of various concentrations of 4-chlorophenol to give pseudo-first-order rate constants ( $k_{\text{obs}}$ ) in 3:1  $\text{CH}_3\text{CN}:\text{H}_2\text{O}$  at 25 °C. The plot of  $k_{\text{obs}}$  against the concentrations of 4-chlorophenol to obtain a second-order-rate constant ( $k_2 = 719.7 \times 10^{-3} \text{ M}^{-1}\text{s}^{-1}$ ). *Conditions to generate 5: 0.5 mM 4 in 3:1  $\text{CH}_3\text{CN}:\text{H}_2\text{O}$  + 20 eq. mCPBA and 140 eq. aqueous NaCl.*

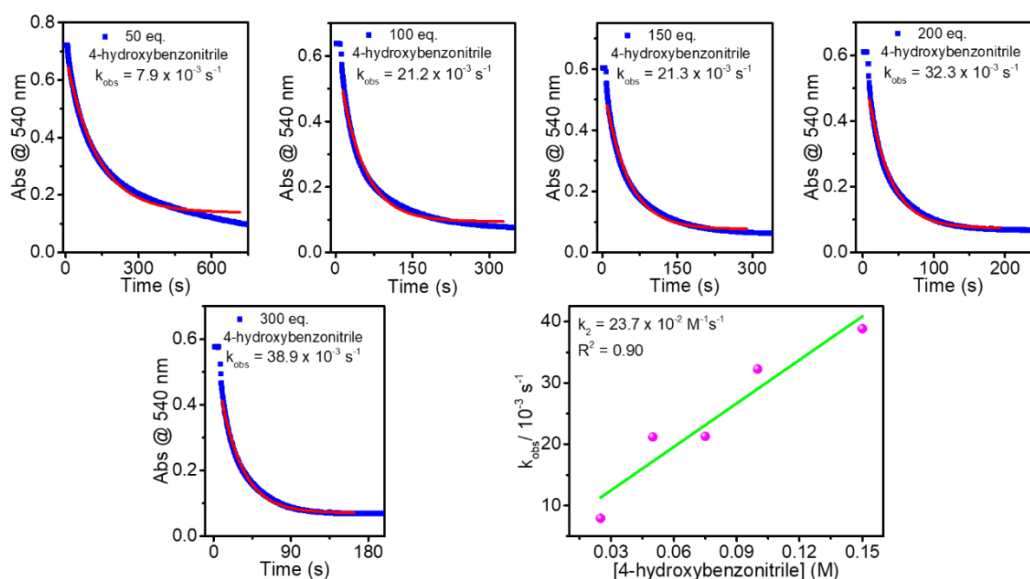

**Fig. S36:** Decay of **5** followed at 540 nm in presence of various concentrations of 4-hydroxybenzointrile to give pseudo-first-order rate constants ( $k_{\text{obs}}$ ) in 3:1  $\text{CH}_3\text{CN}:\text{H}_2\text{O}$  at 25 °C. The plot of  $k_{\text{obs}}$  against the concentrations of 4-hydroxybenzointrile to obtain a second-order-rate constant ( $k_2 = 23.7 \times 10^{-2} \text{ M}^{-1}\text{s}^{-1}$ ). *Conditions to generate 5: 0.5 mM 4 in 3:1  $\text{CH}_3\text{CN}:\text{H}_2\text{O}$  + 20 eq. mCPBA and 140 eq. aqueous NaCl.*

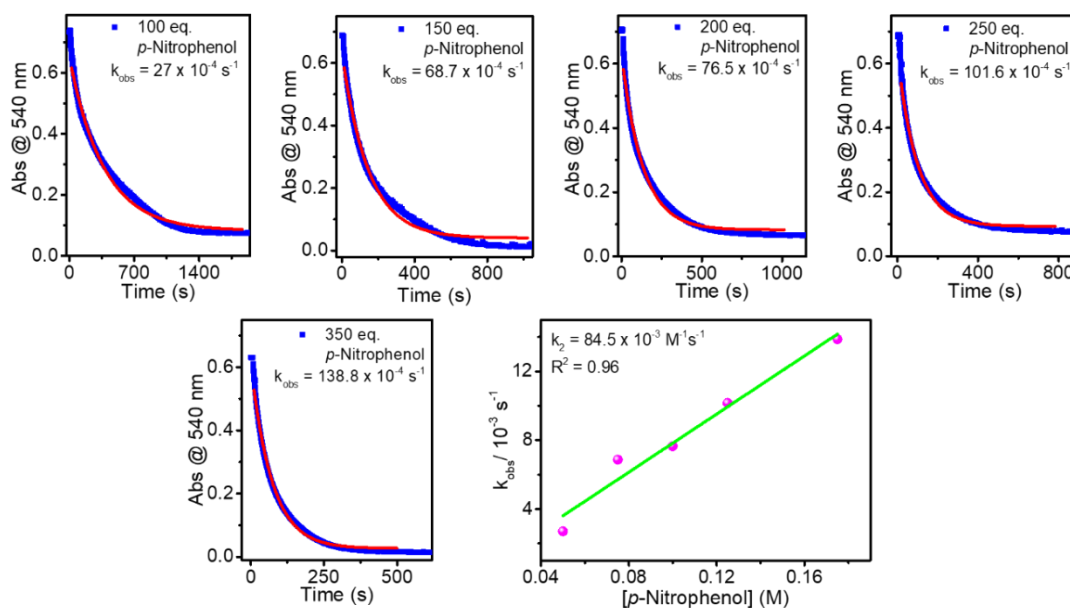

**Fig. S37:** Decay of **5** followed at 540 nm in presence of various concentrations of *p*-nitrophenol to give pseudo-first-order rate constants ( $k_{\text{obs}}$ ) in 3:1  $\text{CH}_3\text{CN}:\text{H}_2\text{O}$  at 25 °C. The plot of  $k_{\text{obs}}$  against the concentrations of *p*-nitrophenol to obtain a second-order-rate constant ( $k_2 = 84.5 \times 10^{-3} \text{ M}^{-1}\text{s}^{-1}$ ). Conditions to generate **5**: 0.5 mM **4** in 3:1  $\text{CH}_3\text{CN}:\text{H}_2\text{O}$  + 20 eq. *m*CPBA and 140 eq. aqueous NaCl.

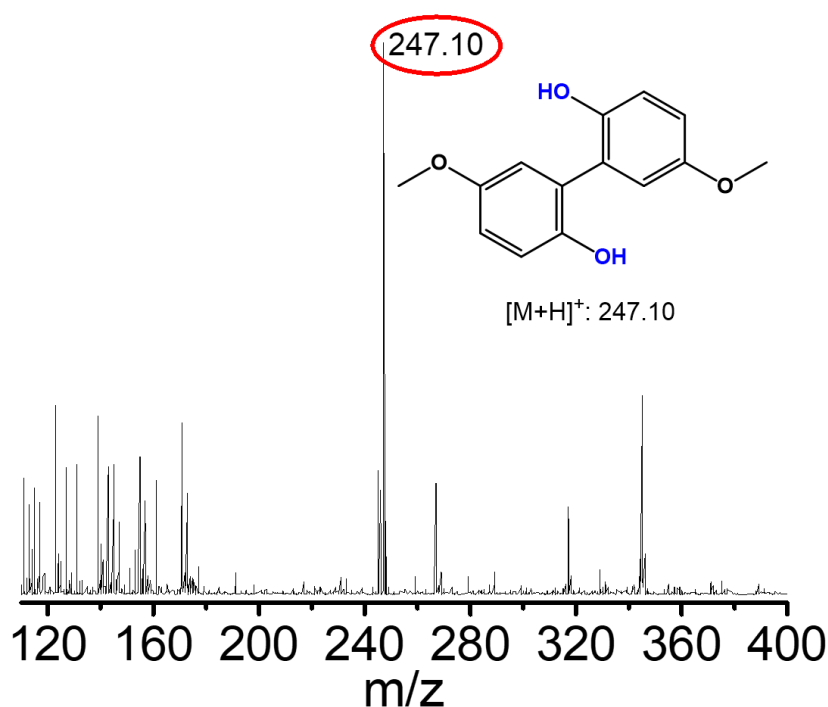

**Fig. S38:** Product analysis of the reaction of **5** with 50 eq. 4-methoxyphenol by APCI-MS. Conditions to generate **5**: 2.0 mM **4** in 3:1  $\text{CH}_3\text{CN}:\text{H}_2\text{O}$  + 20 eq. *m*CPBA and 140 eq. aqueous NaCl at room temperature.

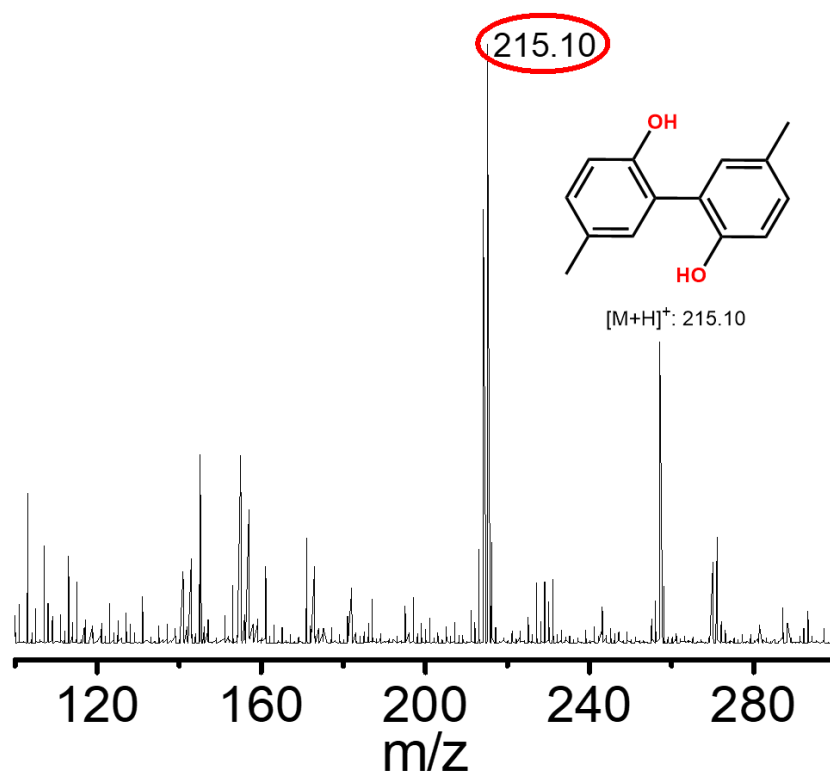

**Fig. S39:** Product analysis of the reaction of **5** with 50 eq. *p*-cresol by APCI-MS. Conditions to generate **5**: 2.0 mM **4** in 3:1  $CH_3CN:H_2O$  + 20 eq. *m*CPBA and 140 eq. aqueous NaCl at room temperature.

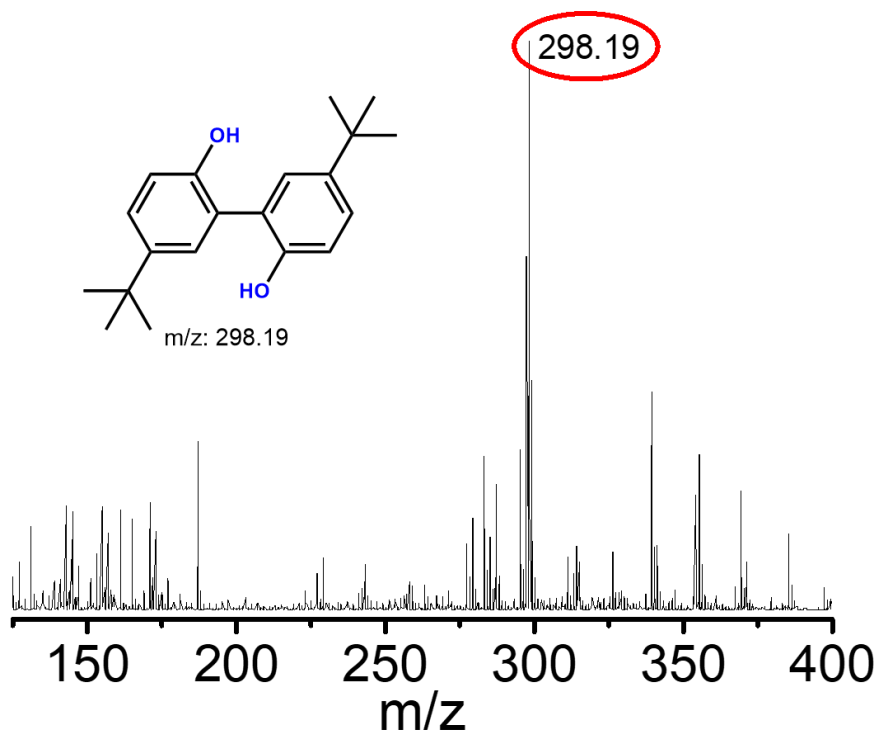

**Fig. S40:** Product analysis of the reaction of **5** with 50 eq. 4-(*tert*-butyl)phenol by APCI-MS. Conditions to generate **5**: 2.0 mM **4** in 3:1  $CH_3CN:H_2O$  + 20 eq. *m*CPBA and 140 eq. aqueous NaCl at room temperature.

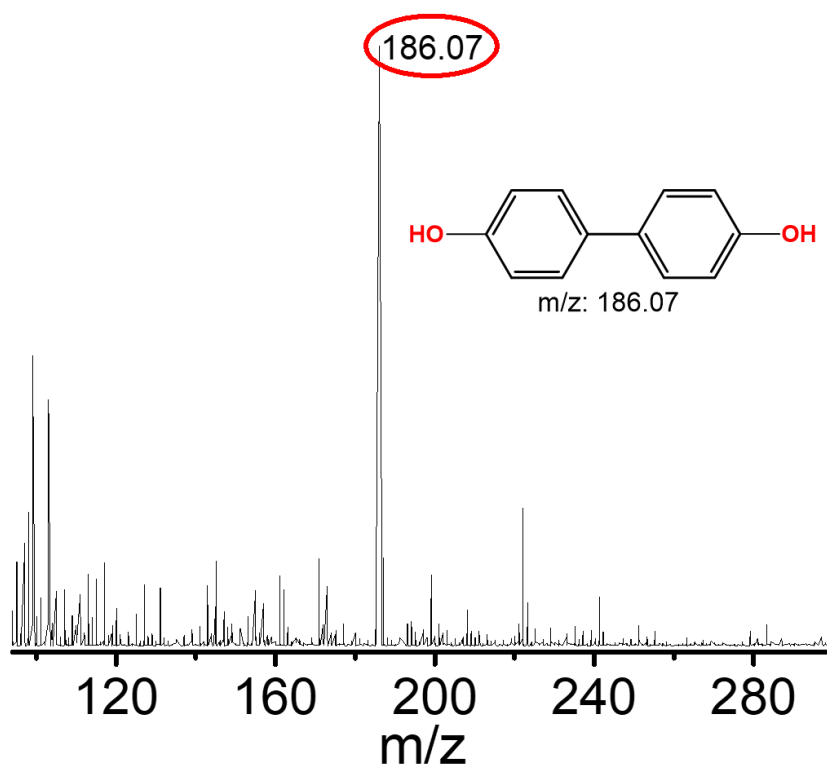

**Fig. S41:** Product analysis of the reaction of 5 with 50 eq. phenol by APCI-MS. Conditions to generate 5: 2.0 mM 4 in 3:1  $\text{CH}_3\text{CN}:\text{H}_2\text{O}$  + 20 eq. *m*CPBA and 140 eq. aqueous NaCl at room temperature.

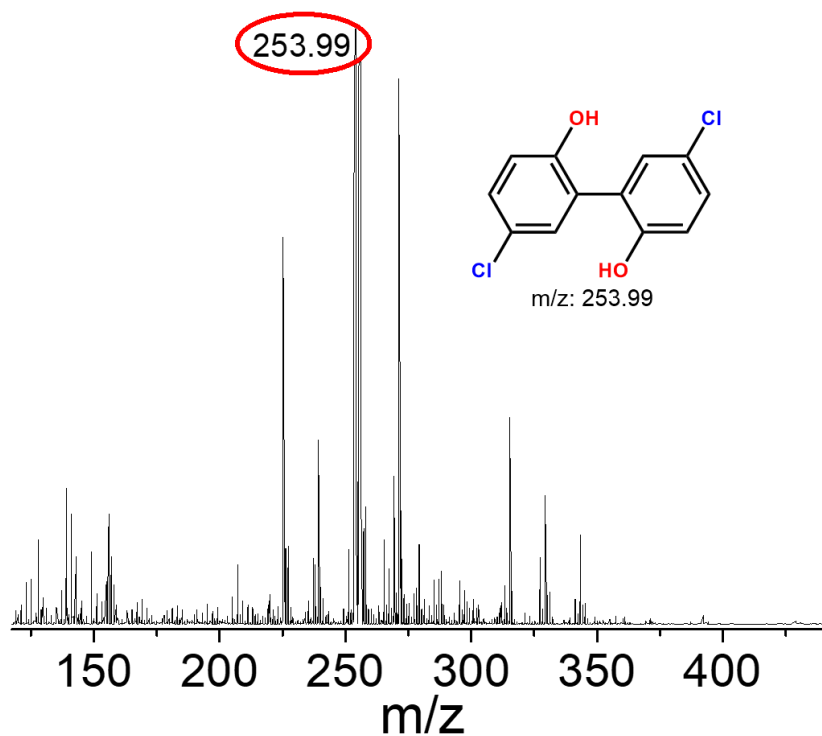

**Fig. S42:** Product analysis of the reaction of 5 with 10 eq. 4-chlorophenol by APCI-MS. Conditions to generate 5: 2.0 mM 4 in 3:1  $\text{CH}_3\text{CN}:\text{H}_2\text{O}$  + 20 eq. *m*CPBA and 140 eq. aqueous NaCl at room temperature.



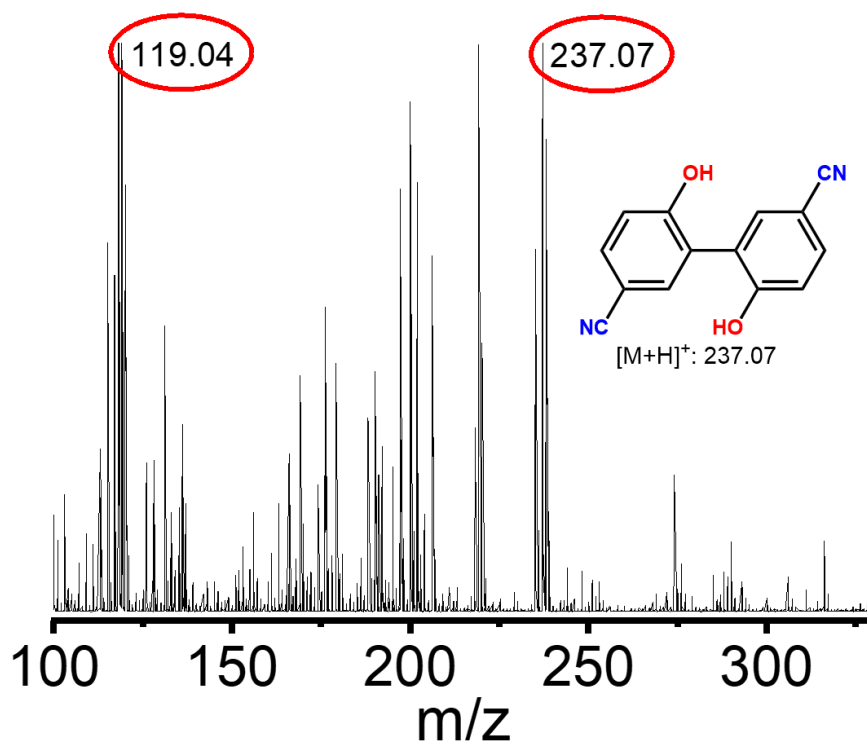

**Fig S43:** Product analysis of the reaction of 5 with 10 eq. 4-hydroxybenzonitrile by APCI-MS. Conditions to generate 5: 2.0 mM 4 in 3:1  $CH_3CN:H_2O$  + 20 eq. mCPBA and 140 eq. aqueous NaCl at room temperature.

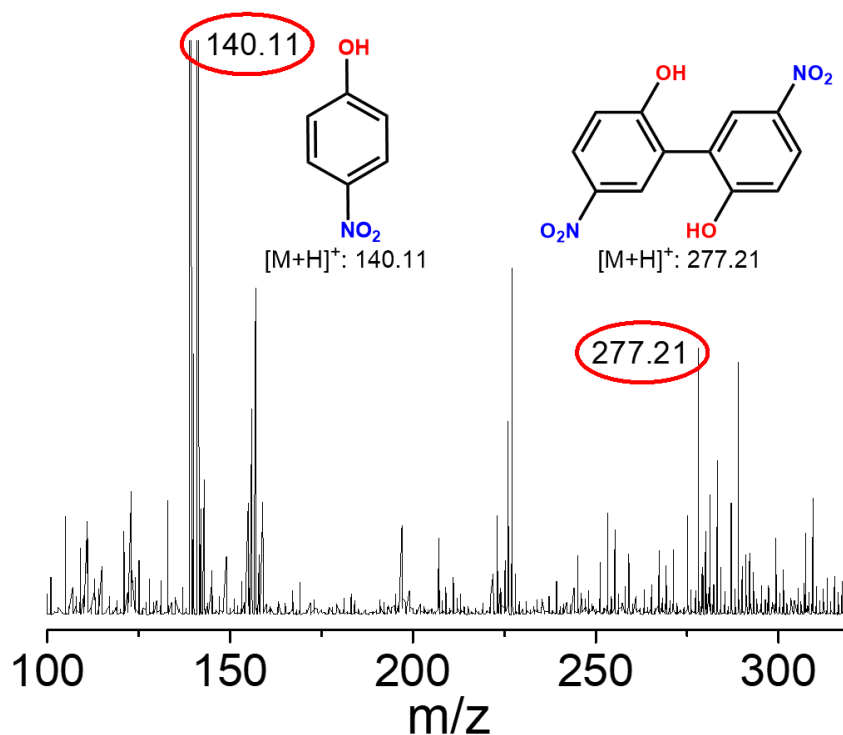

**Fig. S44:** Product analysis of the reaction of 5 with 10 eq. 4-nitrophenol by APCI-MS. Conditions to generate 5: 2.0 mM 4 in 3:1  $CH_3CN:H_2O$  + 20 eq. mCPBA and 140 eq. aqueous NaCl at room temperature.

## References:

- 
- 1) R. Sharma, J. D. Knoll, P. D. Martin, I. Podgorski, C. Turro, J. J. Kodanko, *Inorg. Chem.*, 2014, **53**, 3272–3274.
  - 2) S. Ohzu, T. Ishizuka, Y. Hirai, H. Jiang, M. Sakaguchi, T. Ogura, S. Fukuzumi, T. Kojima, *Chem. Sci.*, 2012, **3**, 3421-3431.
